# Supplementary material for: Ternary deep eutectic solvents for esterification of 2-methylpropenoic acid with alcohols
Source: Royal Society of Chemistry journal article supplement (doi:10.1039/d4ob01180e), 2024-01-01

## Supporting Information

### Ternary deep eutectic solvents for esterification of 2-methylpropenoic acid with alcohols

Jiani Huang,<sup>[a],[§]</sup> Yanyan Li,<sup>[a],[§]</sup> Ruonan Zhang,<sup>[a]</sup> Liran Wang,<sup>[a]</sup> Ming Bao<sup>[a][b]</sup> and  
Xiaoqiang Yu<sup>✉[a][b]</sup>

[a] Jiani Huang, Yanyan Li, Ruonan Zhang, Liran Wang, Xiaoqiang Yu, and Ming Bao

State Key Laboratory of Fine Chemicals, Dalian University of Technology, Dalian, Liaoning 116023, China.

[b] Zhejiang Provincial Innovation Center of Green Petrochemical Technology, Ningbo, Zhejiang 315048, China.

[§] Jiani Huang and Yanyan Li contributed equally.

*E-mail: yuxiaoqiang@dlut.edu.cn*

## Table of contents

|                                                 |     |
|-------------------------------------------------|-----|
| 1. General information .....                    | S1  |
| 2. Optimization of the reaction conditions..... | S1  |
| 3. Experimental procedures .....                | S4  |
| 4. Characterization of products.....            | S7  |
| 5. References .....                             | S14 |
| 6. NMR spectra .....                            | S15 |

## 1. General information

All reactions were carried out using oven-dried schlenk tube (25 mL) and magnetic stirring (the speed is 1000 rpm) under air unless otherwise stated. All commercially available compounds were purchased from Energy, Aladdin, J&K or Macklin. TLC was carried out on SiO<sub>2</sub> (silica gel 60 F254, Merck), and initial spot localization achieved using UV light (254 nm) followed by visualization through smoked spots with molybdate phosphate at elevated temperatures for precise localization. <sup>1</sup>H and <sup>13</sup>C NMR spectra were recorded on a Bruker Avance II-400 spectrometer (400 MHz for <sup>1</sup>H, 101 MHz for <sup>13</sup>C). CDCl<sub>3</sub> and CH<sub>2</sub>Br<sub>2</sub> were used as a solvent and an internal standard, respectively. The chemical shifts were reported in ppm downfield (δ) from CH<sub>2</sub>Br<sub>2</sub>, the coupling constants J are given in Hz. The peak patterns were indicated as follows: s, singlet; d, doublet; t, triplet; m, multiplet; q, quartet. IR spectra were recorded on a NEXUS FT-IR spectrometer. Raman spectra were recorded on a DXR Raman Microscope spectrometer.

## 2. Optimization of the reaction conditions

*Table S1* Effect of DESs<sup>a</sup>

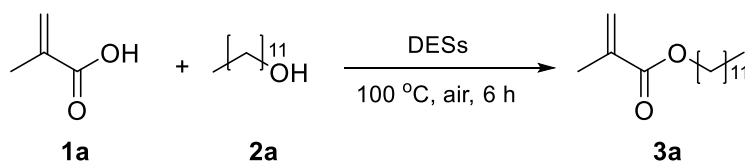

| Entry | DESs name | Equivalence ratio                            | Yield (%) <sup>e</sup> |
|-------|-----------|----------------------------------------------|------------------------|
| 1     | T-DESs-1  | ChCl/PTSA/HQ (1:1:0.02)                      | 95                     |
| 2     | T-DESs-2  | TBAC/PTSA/HQ (1:1:0.02)                      | 61                     |
| 3     | T-DESs-3  | TBAB/PTSA/HQ (1:1:0.02)                      | 51                     |
| 4     | T-DESs-4  | TBAI/PTSA/HQ (1:1:0.02)                      | 54                     |
| 5     | T-DESs-5  | TBAHS/PTSA/HQ (1:1:0.02)                     | 26                     |
| 6     | T-DESs-6  | ChCl/oxalic acid/HQ (1:1:0.02)               | 47                     |
| 7     | T-DESs-7  | ChCl/malonic acid/HQ (1:1:0.02)              | 33                     |
| 8     | T-DESs-8  | ChCl/maleic acid/HQ (1:1:0.02)               | 37                     |
| 9     | T-DESs-9  | ChCl/MCA/HQ (1:1:0.02)                       | 81                     |
| 10    | T-DESs-10 | ChCl/PTSA/ <i>p</i> -Benzoquinone (1:1:0.02) | 86                     |
| 11    | T-DESs-11 | ChCl/PTSA/MEHQ (1:1:0.02)                    | 91                     |

|                 |           |                                                           |    |
|-----------------|-----------|-----------------------------------------------------------|----|
| 12              | T-DESs-12 | ChCl/PTSA/BHT (1:1:0.02)                                  | 81 |
| 13              | DESs-13   | ChCl/PTSA/HQ (1:1:0)                                      | 85 |
| 14              | T-DESs-14 | ChCl/PTSA/HQ (1:1:0.005)                                  | 95 |
| 15              | T-DESs-15 | ChCl/PTSA/HQ (1:1:0.01)                                   | 95 |
| 16              | T-DESs-16 | ChCl/PTSA/HQ (1:1:0.05)                                   | 95 |
| 17              | T-DESs-17 | ChCl/malonic acid/HQ (2:1:0.02)                           | 14 |
| 18              | T-DESs-18 | TEAB/PTSA/HQ (1:1:0.02)                                   | 32 |
| 19              | T-DESs-19 | ChCl/MCA/HQ (1:1:0.02)                                    | 81 |
| 20              | T-DESs-20 | ChCl/ZnCl <sub>2</sub> /HQ (1:2:0.02)                     | 49 |
| 21              | T-DESs-21 | ChCl/ZnBr <sub>2</sub> /HQ (1:2:0.02)                     | 36 |
| 22              | T-DESs-22 | ChCl/maleic acid/HQ (2:1:0.02)                            | 32 |
| 23              | T-DESs-23 | ChCl/PTSA/CuCl (1:1:0.02)                                 | 93 |
| 24              | T-DESs-24 | ChCl/PTSA/FeCl <sub>3</sub> ·6H <sub>2</sub> O (1:1:0.02) | 90 |
| 25 <sup>b</sup> | DESs-25   | ChCl/HQ (1:0.02)                                          | 14 |
| 26 <sup>c</sup> | DESs-26   | PTSA/HQ (1:0.02)                                          | 95 |
| 27              | T-DESs-27 | ChCl/SnCl <sub>2</sub> ·2H <sub>2</sub> O/HQ (1:2:0.02)   | 5  |
| 28 <sup>d</sup> | N-DESs-28 | HQ (0.02)                                                 | 19 |
| 29              | T-DESs-29 | ChCl/PTSA/HQ (1:2:0.02)                                   | 94 |
| 30              | T-DESs-30 | ChCl/PTSA/HQ (2:1:0.02)                                   | 87 |
| 31              | T-DESs-31 | ChCl/PTSA/HQ (2:1:0.025)                                  | 94 |
| 32              | T-DESs-32 | ChCl/PTSA/HQ (1:1:0.0175)                                 | 95 |
| 33              | T-DESs-33 | ChCl/PTSA/HQ (1:1:0.015)                                  | 97 |
| 34              | T-DESs-34 | ChCl/PTSA/HQ (1:1:0.0125)                                 | 93 |
| 35              | T-DESs-35 | ChCl/TFA/HQ (1:2:0.02)                                    | ND |
| 36              | T-DESs-36 | ChCl/PTSA/HQ (1:1:0.0075)                                 | 92 |
| 14              | T-DESs-37 | ChCl/CuCl <sub>2</sub> /HQ (1:2:0.02)                     | 61 |
| 38              | T-DESs-38 | ChCl/PTSA/HQ (1:1:0.0025)                                 | 95 |
| 39              | T-DESs-39 | ChCl/PTSA/HQ (1:1:0.001)                                  | 93 |
| 40              | T-DESs-40 | ChCl/PTSA/HQ (1:1:0.0005)                                 | 88 |
| 41              | T-DESs-41 | ChCl/oxalic acid/HQ (2:1:0.02)                            | 31 |

<sup>a</sup> Reaction conditions: **1a** (0.01 mol), **2a** (0.01 mol, 1.0 equiv.), and DESs (0.01 mol) stir at 100 °C in air for 6 h. <sup>b</sup> ChCl/HQ (0.01 mol), not form DESs. <sup>c</sup> PTSA/HQ (0.01 mol), not form DESs. <sup>d</sup> HQ (0.01 mol). <sup>e</sup> Yield determined by <sup>1</sup>H NMR using CH<sub>2</sub>Br<sub>2</sub> as internal standard.

**Table S2 Effect of other reaction conditions<sup>a</sup>**

| Entry | Temp. (°C) | Time (h) | DESs dosage (eq.) | Yield (%) <sup>b</sup> |
|-------|------------|----------|-------------------|------------------------|
| 1     | 80         | 6        | 1                 | 84                     |
| 2     | 90         | 6        | 1                 | 85                     |
| 3     | 100        | 6        | 1                 | 95                     |
| 4     | 110        | 6        | 1                 | 93                     |
| 5     | 120        | 6        | 1                 | 89                     |
| 6     | 100        | 3        | 1                 | 87                     |
| 7     | 100        | 4        | 1                 | 90                     |
| 8     | 100        | 5        | 1                 | 91                     |
| 9     | 100        | 7        | 1                 | 85                     |
| 10    | 100        | 6        | 0.05              | 88                     |
| 11    | 100        | 6        | 0.1               | 95                     |
| 12    | 100        | 6        | 0.5               | 97                     |

<sup>a</sup> The reaction was carried out using **1a** (10 mmol) and **2a** (10 mmol) in air.

<sup>b</sup> Isolated yields.

**Table S3 Effect of ratio (acid : alcohol) on reaction<sup>a</sup>**

| Entry | Acid : Alcohol | Yield/% <sup>b</sup> |
|-------|----------------|----------------------|
| 1     | 1              | 95                   |
| 2     | 1.2            | 96                   |
| 3     | 1.4            | 97                   |
| 4     | 1.6            | 97                   |

<sup>a</sup> Reaction conditions: Methacrylate (0.01 mol), Dodecanol (X equiv.) and DESs (0.01 mol) stir at 100 °C for 6 h, in air.

<sup>b</sup> Isolated yield.

### 3. Experimental procedures

#### 3.1 Representative procedure for the synthesis of T-DESs 1.

A dry schlenk tube (25 mL) with a magnetic rotor was charged with PTSA (10 mmol),  $\text{CHCl}_3$  (10 mmol) and HQ (0.2 mmol). The mixture was stirred at 70 °C for 20 mins at 800 rpm in air, and T-DESs **1** was formed as a clear and transparent solution.

#### 3.2 General procedure for the synthesis of methacrylate.

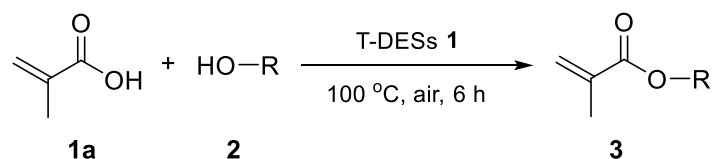

A dry schlenk tube (25 mL) with a magnetic rotor was charged with **1a** (10 mmol), **2** (10 mmol) and T-DESs-**1** (1 equiv.). The mixture was stirred at 100 °C for 6 h in air. After the reaction completed, the reaction mixture was extracted with petroleum ether (3×5 mL). The combined organic layer was dried over  $\text{Na}_2\text{SO}_4$ , then purified by flash column chromatography on silica gel (petroleum ether/ethyl acetate =5:1) to afford the desired products **3**.

#### 3.3 General procedure for the synthesis of dimethyl methacrylate.

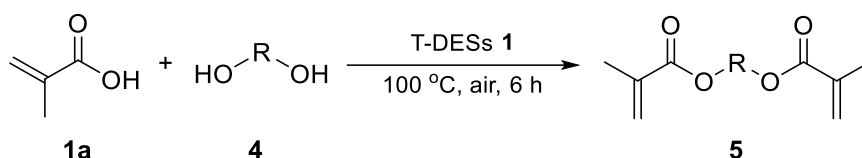

A dry schlenk tube (25 mL) with a magnetic rotor was charged with **1** (20 mmol), **4a-4h** (10 mmol) and T-DESs-**1** (1 equiv.). The mixture was stirred at 100 °C for 6 h in air. After the reaction completed, the reaction mixture was extracted with petroleum ether (3×5 mL). The combined organic layer was dried over  $\text{Na}_2\text{SO}_4$ , then the residue was purified by flash column chromatography on silica gel (petroleum ether/ethyl acetate =3:1)] to afford **5a-5h**.

#### 3.4 Esterification yield at different catalyst recycling runs.

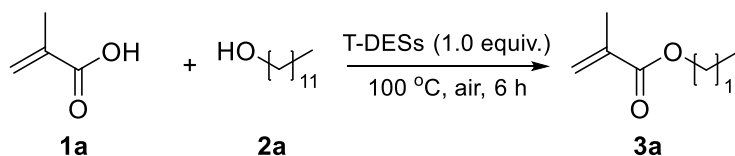

The esterification reaction of **1a** with dodecanol (**2a**) was selected as the model reaction for T-DESs recycling testing. Thus, **2a** (10 mmol) was added to a solution of **1a** (10 mmol) in T-DESs (10 mmol), and the mixture was stirred at 100 °C for 6 h in air. After cooling to room temperature, T-DESs and the organic phase were layered significantly. Product **3** was obtained by collecting the organic layer, and T-DESs was regenerated to start a new catalytic cycle. As shown in **Fig. S1**, T-DESs **2** was recycled 6 times without any decrease in activity. As shown in **Fig. S2**, T-DESs **10** was recycled 6 times with slightly decrease in activity. As shown in **Fig. S3**, T-DESs **1** was recycled 14 times with slightly decrease in activity.

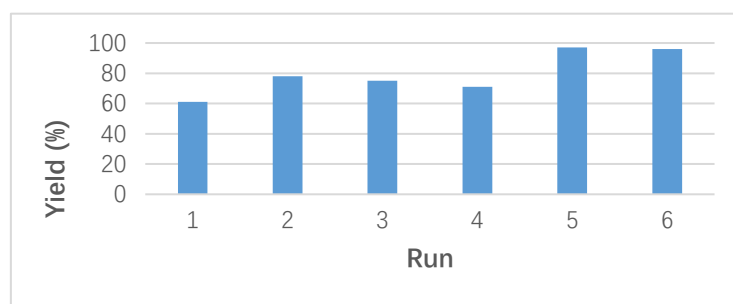

**Fig. S1** Esterification yield at different catalyst recycling runs (at T-DESs **2**, 100 °C reaction temperature, 6 hours reaction time).

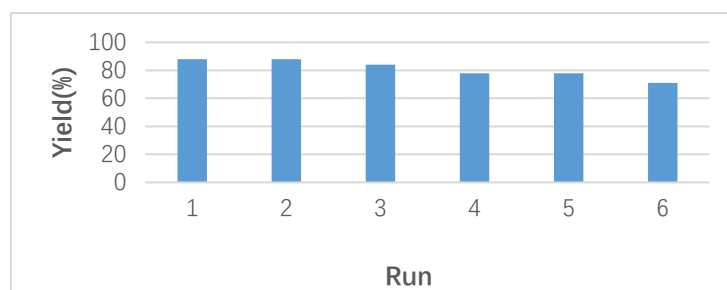

**Fig. S2** Esterification yield at different catalyst recycling runs (at T-DESs **10**, 100 °C reaction temperature, 6 hours reaction time).

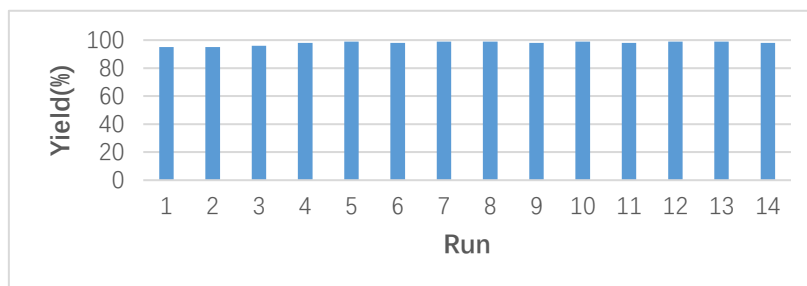

**Fig. S3** Esterification yield at different catalyst recycling runs (at T-DESs **1**, 100 °C reaction temperature, 6 hours reaction time).

### 3.5 Key metric calculations.

According to the quantitative metrics typical of First and Second Pass evaluations in the CHEM21 Metrics Toolkit<sup>1,2</sup>, the use of T-DESs **1** as a catalyst for esterification reaction showed superior atom economy (AE), reaction mass efficiency (RME), optimum efficiency (OE), and total process mass intensity (PMI) than traditional catalysts, demonstrating good potential industrial application value.

$$AE = (\text{molecular weight of product}) / (\text{total molecular weight of reactants}) \times 100$$

$$RME = (\text{mass of isolated product}) / (\text{total mass of reactants}) \times 100$$

$$OE = (RME) / (AE) \times 100$$

$$PMI = (\text{total mass in a process or process step}) / (\text{mass of product})$$

**Table S4** The calculations in use of CHEM21 Metrics Toolkit<sup>a</sup>

| Entry | Catalyst                            | AE | PME | OE | PMI  |
|-------|-------------------------------------|----|-----|----|------|
| 1     | H <sub>2</sub> SO <sub>4</sub>      | 93 | 81  | 87 | 1.56 |
| 2     | acidic resin                        | 94 | 88  | 94 | 1.26 |
| 3     | heteropoly acid                     | 91 | 41  | 45 | 2.50 |
| 4     | ionic liquid                        | 94 | 44  | 47 | 2.44 |
| 5     | metal organic<br>framework material | 89 | 42  | 47 | 2.32 |
| 6     | T-DESs <b>1</b>                     | 93 | 91  | 98 | 1.07 |

<sup>a</sup>The result is retained as an integer, PMI retains two decimal places.



#### 4. Characterization of products

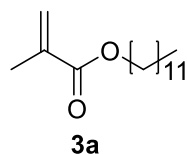

**Lauryl methacrylate ester (3a)**<sup>3</sup>: Colorless liquid; <sup>1</sup>H NMR (400 MHz, Chloroform-d)  $\delta$  6.05 (s, 1H), 5.48 (s, 1H), 4.09 (t,  $J = 6.7$  Hz, 2H), 1.89 (s, 3H), 1.68-1.61 (m, 2H), 1.35-1.24 (m, 18H), 0.83 (t,  $J = 6.7$  Hz, 3H); <sup>13</sup>C NMR (101 MHz, Chloroform-d)  $\delta$  167.4, 136.6, 125.0, 64.8, 32.0, 29.7, 29.6, 29.6, 29.4, 29.3, 28.7, 26.0, 22.7, 18.3, 14.1.

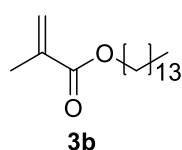

**Tetradecyl methacrylate ester (3b)**: Colorless liquid; <sup>1</sup>H NMR (400 MHz, Chloroform-d):  $\delta$  6.09 (s, 1H), 5.54 (s, 1H), 4.13 (t,  $J = 6.7$  Hz, 2H), 1.94 (s, 3H), 1.72-1.62 (m, 2H), 1.38-1.25 (m, 22H), 0.87 (t,  $J = 6.7$  Hz, 3H); <sup>13</sup>C NMR (101 MHz, Chloroform-d)  $\delta$  167.6, 136.6, 125.1, 64.9, 31.9, 29.69, 29.68, 29.66, 29.65, 29.6, 29.5, 29.4, 29.3, 28.6, 26.0, 22.7, 18.3, 14.1; FT-IR (KBr, cm<sup>-1</sup>): 2925, 1721, 1638, 1467, 1321, 1296, 1165, 722; HRMS (ESI): [M+Na]<sup>+</sup> calcd for C<sub>18</sub>H<sub>34</sub>O<sub>2</sub>Na<sup>+</sup>: 305.2457; found: 305.2451.

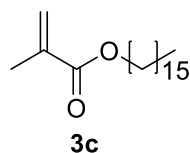

**Hexadecyl methacrylate ester (3c)**: Colorless liquid; <sup>1</sup>H NMR (400 MHz, Chloroform-d):  $\delta$  6.09 (s, 1H), 5.53 (s, 1H), 4.12 (t,  $J = 6.7$  Hz, 2H), 1.93 (s, 3H), 1.71-1.62 (m, 2H), 1.38 - 1.25 (m, 26H), 0.87 (t,  $J = 6.7$  Hz, 3H); <sup>13</sup>C NMR (101 MHz, Chloroform-d)  $\delta$  167.6, 136.6, 125.1, 64.9, 31.9, 29.69, 29.68, 29.66, 29.65, 29.6, 29.5, 29.4, 29.3, 28.6, 26.0, 22.7, 18.3, 14.1; FT-IR (KBr, cm<sup>-1</sup>): 2925, 1722, 1638, 1466, 1321, 1296, 1165, 722; HRMS (ESI): [M+Na]<sup>+</sup> calcd for C<sub>20</sub>H<sub>38</sub>O<sub>2</sub>Na<sup>+</sup>: 333.2770; found: 333.2764.

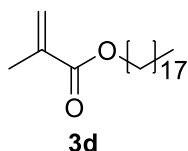

**Octadecyl methacrylate (3d):** White solid; mp 18-20 °C;  $^1\text{H NMR}$  (400 MHz, Chloroform-d):  $\delta$  6.09 (s, 1H), 5.54 (s, 1H), 4.13 (t,  $J = 6.7$  Hz, 2H), 1.94 (s, 3H), 1.71-1.62 (m, 2H), 1.36-1.25 (m, 30H), 0.87 (t,  $J = 6.7$  Hz, 3H);  $^{13}\text{C NMR}$  (101 MHz, Chloroform-d)  $\delta$  167.6, 136.6, 125.11, 64.9, 32.0, 29.8, 29.68, 29.66, 29.6, 29.5, 29.4, 29.3, 28.6, 26.0, 22.7, 18.3, 14.1; FT-IR (KBr,  $\text{cm}^{-1}$ ): 2926, 1718, 1637, 1458, 1319, 1295, 1161, 722; HRMS (ESI):  $[\text{M}+\text{Na}]^+$  calcd for  $\text{C}_{22}\text{H}_{42}\text{O}_2\text{Na}^+$ : 361.3083; found: 361.3077.

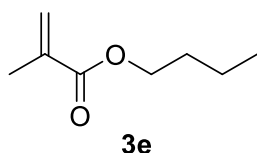

**N-butyl methacrylate (3e)**<sup>4</sup>: Colorless liquid;  $^1\text{H NMR}$  (400 MHz, Chloroform-d):  $\delta$  6.08 (s, 1H), 5.52 (s, 1H), 4.13 (t,  $J = 6.6$  Hz, 2H), 1.92 (s, 3H), 1.60-1.67 (m, 2H), 1.45-1.34 (m, 2H), 0.93 (t,  $J = 7.4$  Hz, 3H);  $^{13}\text{C NMR}$  (101 MHz, Chloroform-d)  $\delta$  167.5, 136.6, 125.0, 64.5, 30.7, 19.2, 18.2, 13.7.

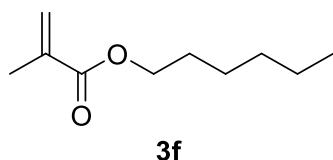

**N-hexyl methacrylate (3f)**<sup>5</sup>: Colorless liquid;  $^1\text{H NMR}$  (400 MHz, Chloroform-d):  $\delta$  6.01 (s, 1H), 5.47-5.42 (m, 1H), 4.05 (t,  $J = 6.7$  Hz, 2H), 1.85 (s, 3H), 1.59 (q,  $J = 7.0$  Hz, 2H), 1.33-1.21 (m, 6H), 0.81 (t,  $J = 7.4$  Hz, 3H);  $^{13}\text{C NMR}$  (101 MHz, Chloroform-d)  $\delta$  166.3, 135.6, 123.9, 63.7, 30.5, 27.7, 24.7, 21.6, 17.3, 12.9.

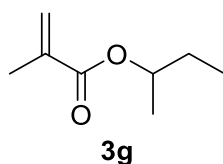

**Sec-butyl methacrylate (3g):** Colorless liquid;  $^1\text{H NMR}$  (400 MHz, Chloroform-d):  $\delta$  6.08 (s, 1H), 5.52 (s, 1H), 4.94-4.86 (m, 1H), 1.94 (s, 3H), 1.69-1.54 (m, 2H), 1.24 (d,  $J = 6.3$  Hz, 3H), 0.92 (t,  $J = 7.5$  Hz, 3H);  $^{13}\text{C NMR}$  (101 MHz, Chloroform-d)  $\delta$  167.1,

136.9, 124.8, 72.4, 28.8, 19.4, 18.3, 9.6; FT-IR (KBr,  $\text{cm}^{-1}$ ): 2932, 1698, 1636, 1456, 1398, 1299, 1204; HRMS (ESI):  $[\text{M}+\text{Na}]^+$  calcd for  $\text{C}_{13}\text{H}_{34}\text{O}_2\text{Na}^+$ : 165.0892; found: 165.0886.

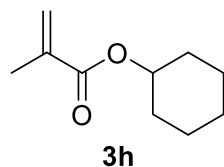

**Cyclohexyl methacrylate (3h)**<sup>5</sup>: Colorless liquid;  $^1\text{H NMR}$  (400 MHz, Chloroform-d):  $\delta$  6.09 (s, 1H), 5.53 (s, 1H), 4.87-4.81 (m, 1H), 1.94 (s, 3H), 1.89-1.82 (m, 2H), 1.76-1.70 (m, 2H), 1.56-1.26 (m, 6H);  $^{13}\text{C NMR}$  (101 MHz, Chloroform-d)  $\delta$  166.8, 137.0, 124.8, 72.6, 31.5, 25.5, 23.6, 18.3.

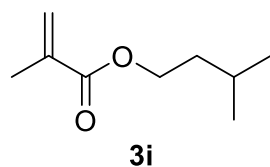

**Isoamyl methacrylate (3i)**: Colorless liquid;  $^1\text{H NMR}$  (400 MHz, Chloroform-d):  $\delta$  6.09 – 6.04 (m, 1H), 5.54 – 5.48 (m, 1H), 4.14 (t,  $J = 6.9$  Hz, 2H), 1.91 (s, 3H), 1.68 (m, 1H), 1.54 (q,  $J = 7.0$  Hz, 2H), 0.94 – 0.88 (m, 6H);  $^{13}\text{C NMR}$  (101 MHz, Chloroform-d)  $\delta$  167.4, 136.5, 125.0, 63.2, 37.3, 25.1, 22.4, 18.2; FT-IR (KBr,  $\text{cm}^{-1}$ ): 2931, 1719, 1637, 1457, 1404, 1297, 1161; HRMS (ESI):  $[\text{M}+\text{Na}]^+$  calcd for  $\text{C}_{13}\text{H}_{34}\text{O}_2\text{Na}^+$ : 179.1048; found: 179.1045.

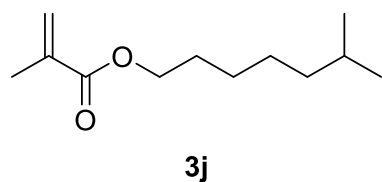

**6-Methyl-1-heptanol methacrylate (3j)**: Colorless liquid;  $^1\text{H NMR}$  (400 MHz, Chloroform-d):  $\delta$  6.01 (s, 1H), 5.44 (s, 1H), 4.02-3.93 (t,  $J = 5.7$  Hz, 2H), 1.85 (s, 3H), 1.57 – 1.51 (m, 1H), 1.34-1.18 (m, 8H), 0.82 (d,  $J = 7.4$  Hz, 6H);  $^{13}\text{C NMR}$  (101 MHz, Chloroform-d)  $\delta$  167.2, 136.5, 124.8, 66.8, 38.8, 30.5, 28.9, 23.9, 22.9, 18.1, 13.8, 10.9; FT-IR (KBr,  $\text{cm}^{-1}$ ): 2930, 1720, 1638, 1459, 1403, 1296, 1168; HRMS (ESI):  $[\text{M}+\text{Na}]^+$  calcd for  $\text{C}_{12}\text{H}_{22}\text{O}_2\text{Na}^+$ : 221.1518; found: 221.1512.

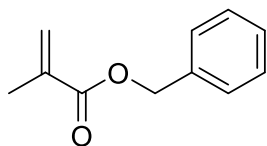

**3k**

**Benzyl methacrylate (3k)**<sup>6</sup>: Colorless liquid; <sup>1</sup>H NMR (400 MHz, Chloroform-d):  $\delta$  7.39-7.32 (m, 5H), 6.18 (s, 1H), 5.60 (s, 1H), 5.21 (s, 2H), 1.99 (s, 3H); <sup>13</sup>C NMR (101 MHz, Chloroform-d)  $\delta$  167.2, 136.3, 136.2, 128.6, 128.1, 128.0, 125.8, 66.4, 18.4.

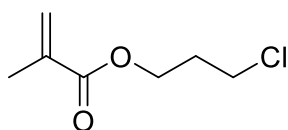

**3l**

**3-chloro-1-propanol methacrylate (3l)**<sup>7</sup>: Colorless liquid; <sup>1</sup>H NMR (400 MHz, Chloroform-d):  $\delta$  6.14 (s, 1H), 5.60 (s, 1H), 4.32 (t,  $J$  = 6.0 Hz, 2H), 3.66 (t,  $J$  = 6.4 Hz, 2H), 2.17 (t,  $J$  = 6.3 Hz, 2H), 1.97 (s, 3H); <sup>13</sup>C NMR (101 MHz, Chloroform-d)  $\delta$  167.2, 136.2, 125.7, 61.4, 41.3, 31.7, 18.3.

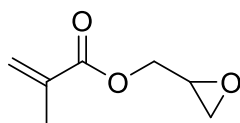

**3m**

**Glycidyl methacrylate (3m)**<sup>8</sup>: Colorless liquid; <sup>1</sup>H NMR (400 MHz, Chloroform-d):  $\delta$  6.16 (s, 1H), 5.61 (s, 1H), 4.48 (d,  $J$  = 12.5 Hz, 1H), 4.00 (d,  $J$  = 12.3 Hz, 1H), 3.28 - 3.23 (m, 1H), 2.85 (d,  $J$  = 4.6 Hz, 1H), 2.67 (d,  $J$  = 2.6 Hz, 1H), 1.96 (s, 3H); <sup>13</sup>C NMR (101 MHz, Chloroform-d)  $\delta$  167.0, 135.8, 126.2, 65.1, 49.4, 44.6, 18.3.

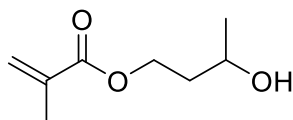

**3n**

**3-hydroxybutyl methacrylate (3n)**<sup>9</sup>: Colorless liquid; <sup>1</sup>H NMR (400 MHz, Chloroform-d):  $\delta$  6.11 (s, 1H), 5.63-5.53 (m, 1H), 4.47-4.36 (m, 1H), 4.26-4.16 (m, 1H), 3.97 - 3.83 (m, 1H), 1.95 (s, 3H), 1.85-1.74 (m, 2H), 1.25 (d,  $J$  = 6.3 Hz, 3H); <sup>13</sup>C NMR (101 MHz, Chloroform-d)  $\delta$  167.8, 136.2, 125.7, 64.9, 61.9, 38.1, 23.5, 18.3.

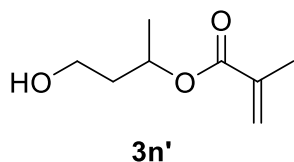

**(methyl)propenoic acid 1-methyl-3-hydroxypropyl ester (3n')**<sup>9</sup>: Colorless liquid; <sup>1</sup>H NMR (400 MHz, Chloroform-d):  $\delta$  6.11 (s, 1H), 5.63-5.53 (m, 1H), 5.22-5.11 (m, 1H), 3.69-3.63 (m, 1H), 3.61 -3.55 (m, 1H), 1.95(s, 3H), 1.85-1.72 (m, 2H), 1.32 (d,  $J$  = 6.3 Hz, 3H); <sup>13</sup>C NMR (101 MHz, Chloroform-d)  $\delta$  167.8, 136.4, 125.7, 68.5, 58.8, 39.2, 23.5, 20.5.

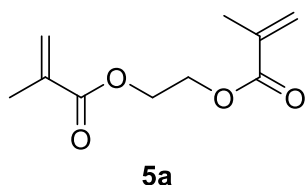

**Ethylene glycol dimethyl acrylate (5a)**<sup>10</sup>: Colorless liquid; <sup>1</sup>H NMR (400 MHz, Chloroform-d):  $\delta$  6.12 (s, 1H), 5.58 (s, 1H), 4.39 (s, 2H), 1.94 (s, 2H); <sup>13</sup>C NMR (101 MHz, Chloroform-d)  $\delta$  167.1, 135.9, 126.0, 62.3, 18.2.

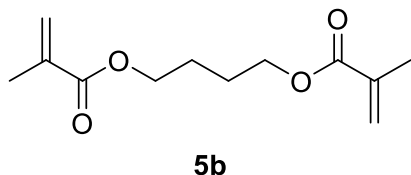

**1,4-butanediol dimethyl acrylate (5b)**<sup>11</sup>: Colorless liquid; <sup>1</sup>H NMR (400 MHz, Chloroform-d):  $\delta$  6.08 (s, 1H), 5.54 (s, 1H), 4.17 (d,  $J$  = 5.5 Hz, 2H), 1.92 (s, 3H), 1.82-1.63 (m, 2H); <sup>13</sup>C NMR (101 MHz, Chloroform-d)  $\delta$  167.4, 136.3, 125.4, 64.2, 25.4, 18.3.

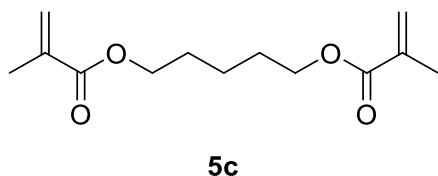

**1,5-pentanediol dimethyl acrylate (5c)**: Colorless liquid; <sup>1</sup>H NMR (400 MHz, Chloroform-d):  $\delta$  6.02 (s, 2H), 5.47 (s, 2H), 4.09 (t,  $J$  = 6.5 Hz, 4H), 1.82 (s, 6H), 1.69-1.62 (m, 4H), 1.46-1.38 (m, 2H); <sup>13</sup>C NMR (101 MHz, Chloroform-d)  $\delta$  167.4, 136.4, 125.3, 64.4, 28.3, 22.6, 18.4; FT-IR (KBr, cm<sup>-1</sup>): 2957, 1719, 1637, 1455, 1404, 1297,

1166; HRMS (ESI):  $[M+Na]^+$  calcd for  $C_{13}H_{34}O_2Na^+$ : 263.1259; found: 263.1256.

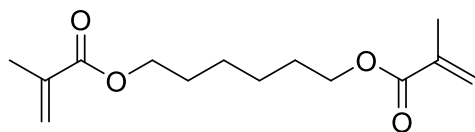

**5d**

**1,6-hexanediol dimethyl acrylate (5d)**<sup>12</sup>: Colorless liquid;  $^1H$  NMR (400 MHz, Chloroform-d):  $\delta$  6.01 (s, 2H), 5.49-5.43 (m, 2H), 4.06 (t,  $J$  = 6.6 Hz, 4H), 1.85 (s, 5H), 1.61 (s, 4H), 1.41-1.29 (m, 4H);  $^{13}C$  NMR (101 MHz, Chloroform-d)  $\delta$  167.3, 136.4, 125.1, 64.5, 28.5, 25.6, 18.2.

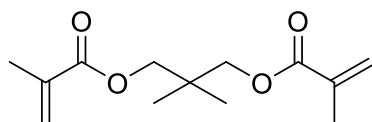

**5e**

**Neopentyl glycol dimethyl acrylate (5e)**: Colorless liquid;  $^1H$  NMR (400 MHz, Chloroform-d):  $\delta$  6.05 (s, 2H), 5.51 (s, 2H), 3.93 (s, 4H), 1.89 (s, 6H), 0.98 (s, 6H);  $^{13}C$  NMR (101 MHz, Chloroform-d)  $\delta$  167.0, 136.1, 125.5, 69.3, 34.9, 21.8, 18.2; FT-IR (KBr,  $cm^{-1}$ ): 2931, 1716, 1636, 1457, 1398, 1299, 1168; HRMS (ESI):  $[M+Na]^+$  calcd for  $C_{13}H_{34}O_2Na^+$ : 263.1259; found: 263.1256.

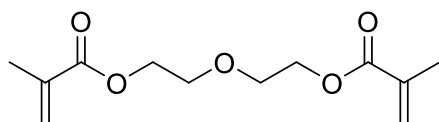

**5f**

**Diethylene glycol dimethacrylate (5f)**<sup>13</sup>: Colorless liquid;  $^1H$  NMR (400 MHz, Chloroform-d):  $\delta$  6.12 (s, 2H), 5.62-5.56(m, 2H), 4.37-4.28(m, 4H), 3.82-3.74(m, 4H), 1.94(s, 6H);  $^{13}C$  NMR (101 MHz, Chloroform-d)  $\delta$  167.3, 136.1, 125.8, 69.0, 63.7, 18.2.

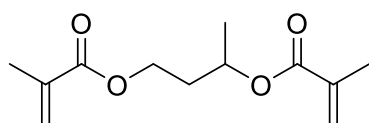

**5g**

**1,3-butanediol dimethacrylate (5g)**<sup>9</sup>: Colorless liquid;  $^1H$  NMR (400 MHz,

Chloroform-d):  $\delta$  6.11-6.03 (m, 2H), 5.61-5.48(m, 2H), 5.09-4.99(m, 1H), 4.21-4.07(m, 2H), 2.00-1.89(m, 2H), 1.86(s, 6H), 1.25(d,  $J = 6.3$  Hz, 3H);  $^{13}\text{C}$  NMR (101 MHz, Chloroform-d)  $\delta$  167.3, 166.8, 136.5, 136.2, 125.6, 125.3, 68.3, 31.1, 34.9, 20.1, 18.27, 18.25.

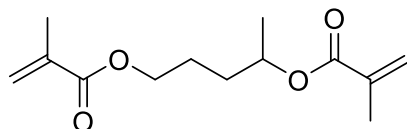

**5h**

**Ethylene propylene dimethacrylate (5h)**<sup>14</sup>: Colorless liquid;  $^1\text{H}$  NMR (400 MHz, Chloroform-d):  $\delta$  6.08-5.96 (m, 2H), 5.53-5.43(m, 2H), 4.99-4.87(m, 1H), 4.13-4.05(m, 2H), 1.87(s, 6H), 1.71-1.58(m, 4H), 1.21(d,  $J = 6.3$  Hz, 3H);  $^{13}\text{C}$  NMR (101 MHz, Chloroform-d)  $\delta$  167.4, 167.0, 136.7, 136.4, 125.3, 125.1, 70.7, 64.4, 32.4, 24.7, 19.9, 18.3.

## 5. References

1. S. Abou-Shehada, P. Mampuy, B. U. W. Maes, J. H. Clark and L. Summerton, *Green Chem.*, 2017, **19**, 249-258.
2. C. R. McElroy, A. Constantinou, L. C. Jones, L. Summerton and J. H. Clark, *Green Chem.*, 2015, **17**, 3111-3121.
3. H. Fouilloux, W. Qiang, C. Robert, V. Placet, and C. M. Thomas, *Angew. Chem. Int. Ed.*, 2021, **60**, 19374-19382.
4. S. A. Dergunov, *ChemComm.*, 2021, **57**, 10612-10615.
5. M. Hatano, F. Yoshiro, T. Shimmura, M. Katsuhiko, S. Kamiya, M. Toshikatsu, and I. Kazuaki, *Org. Lett.*, 2011, **13** (3), 426-429.
6. W. Shen, Q. Wu, X. Gong, G. Ao and F. Liu, *Green Chem.*, 2019, **21**, 2983-2987.
7. Z. Fang, A. Ito, H. Luo, A. L. Dennis, C. J. Javier, L. Alibabaei and M. J. Thomas, *Dalton Trans.*, 2015, **44**, 8640-8648.
8. B. Guerdener, V. Ayzac, S. Norsic, P. Besognet, V. Bounor-Legaré, V. Monteil, V. Dufaud, J. Raynaud and Y. Chalamet, *Green Chem.*, 2023, **25**, 6355-6364.
9. Current Patent Assignee: NAGOYA UNIVERSITY - JP2019/26618, 2019, A
10. Y. He, C. Wang, P. Zou, R. Lin, E. Hu and H. Xin, *Angew. Chem. Int. Ed.*, 2023, **62**, e202308309.
11. S.A. Dergunov and E. Pinkhassik, *Angew. Chem.*, 2020, **132**, 18563-18569.
12. U. Guenther, K. Albertand M. Grossa, *J. Magn. Reson.*, 1992, **98**, 593-598.
13. S. A. Chesnokov, M. Y. Zakharina, A. S. Shaplov, E. I. Lozinskaya, I. A. Malyshkina, G. A. Abakumov, F. Vidal and Y. S. Vygodskii, *J. Polym Sci.*, 2010, **48**, 2388-2409.
14. P. Voigt, N. Kiri, K. Jähnichen and B. Voit, *ACS Sustainable Chem. Eng.*, 2024, **12**, 1984-1996.



## 6. NMR Spectra

$^1\text{H}$  NMR, 400 MHz,  $\text{CDCl}_3$

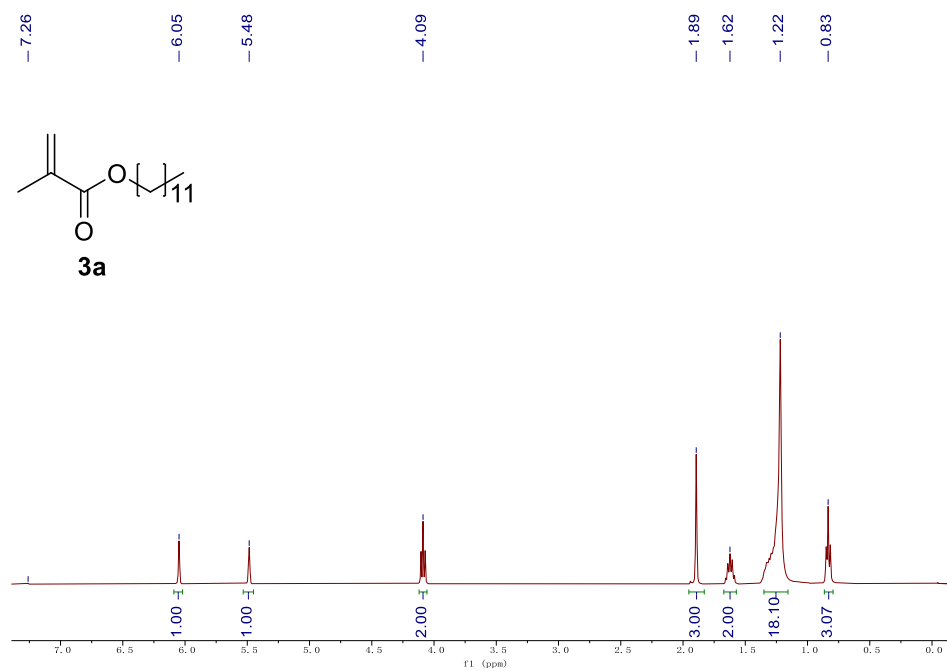

$^{13}\text{C}$  NMR, 101 MHz,  $\text{CDCl}_3$

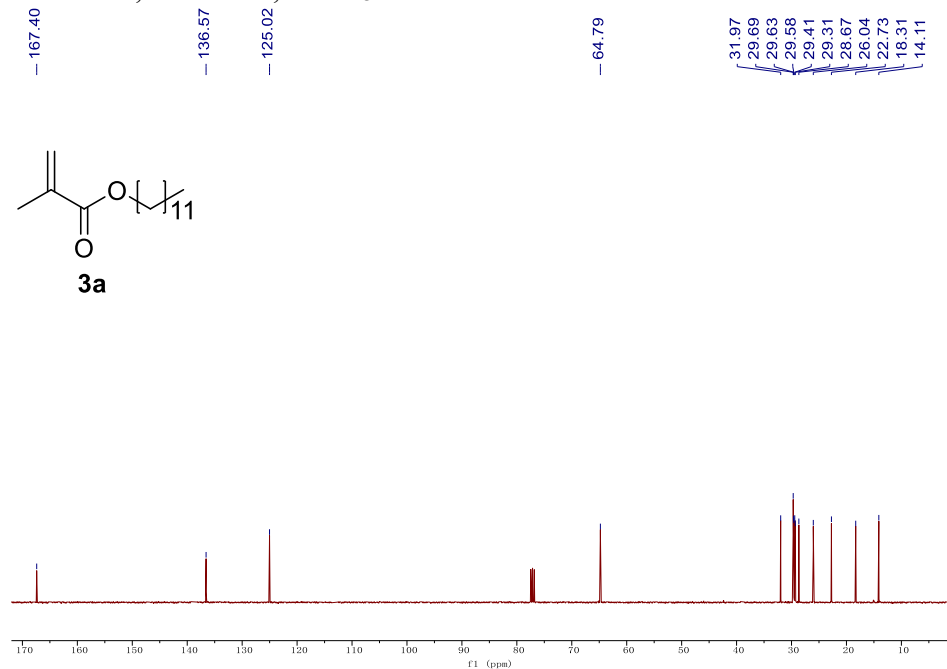

$^1\text{H}$  NMR, 400 MHz,  $\text{CDCl}_3$

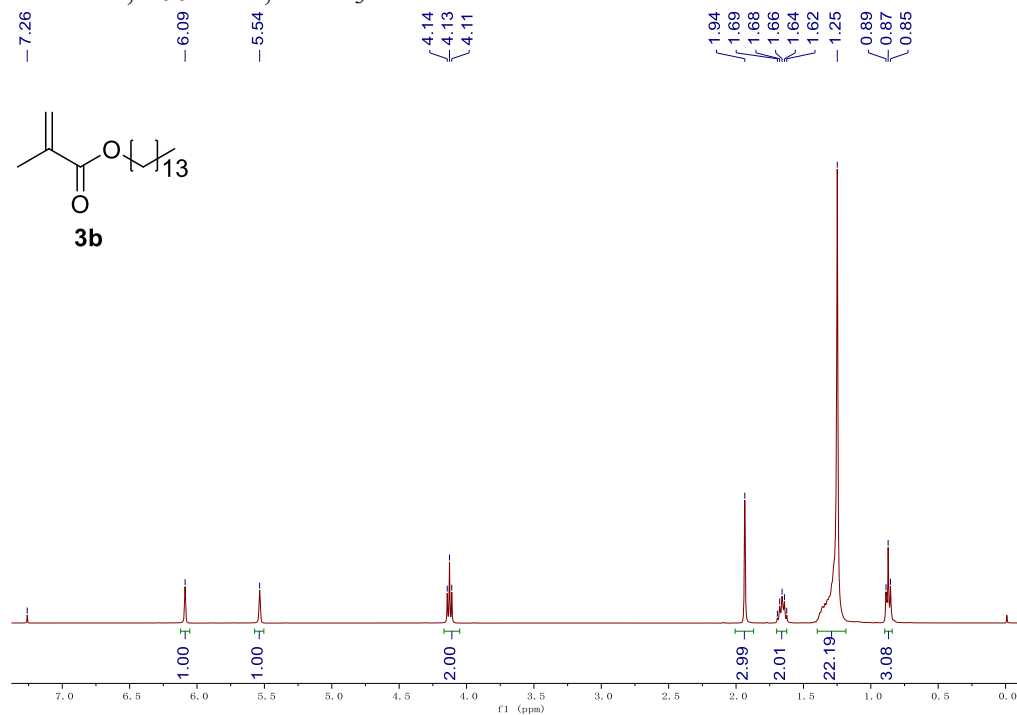

$^{13}\text{C}$  NMR, 101 MHz,  $\text{CDCl}_3$

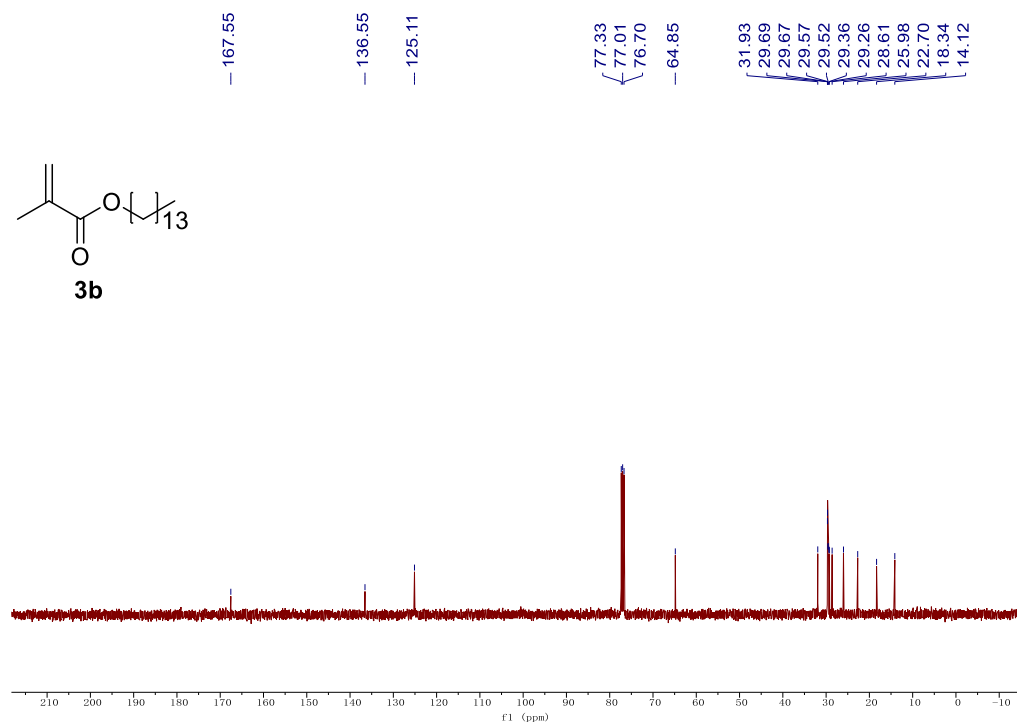

$^1\text{H}$  NMR, 400 MHz,  $\text{CDCl}_3$

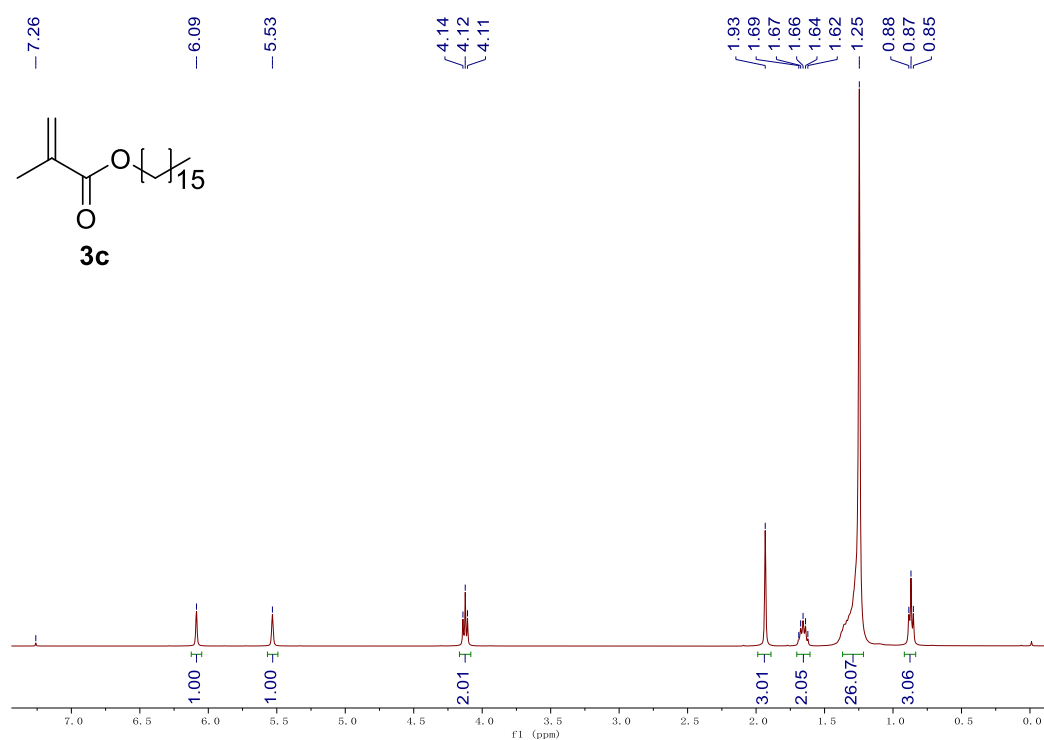

$^{13}\text{C}$  NMR, 101 MHz,  $\text{CDCl}_3$

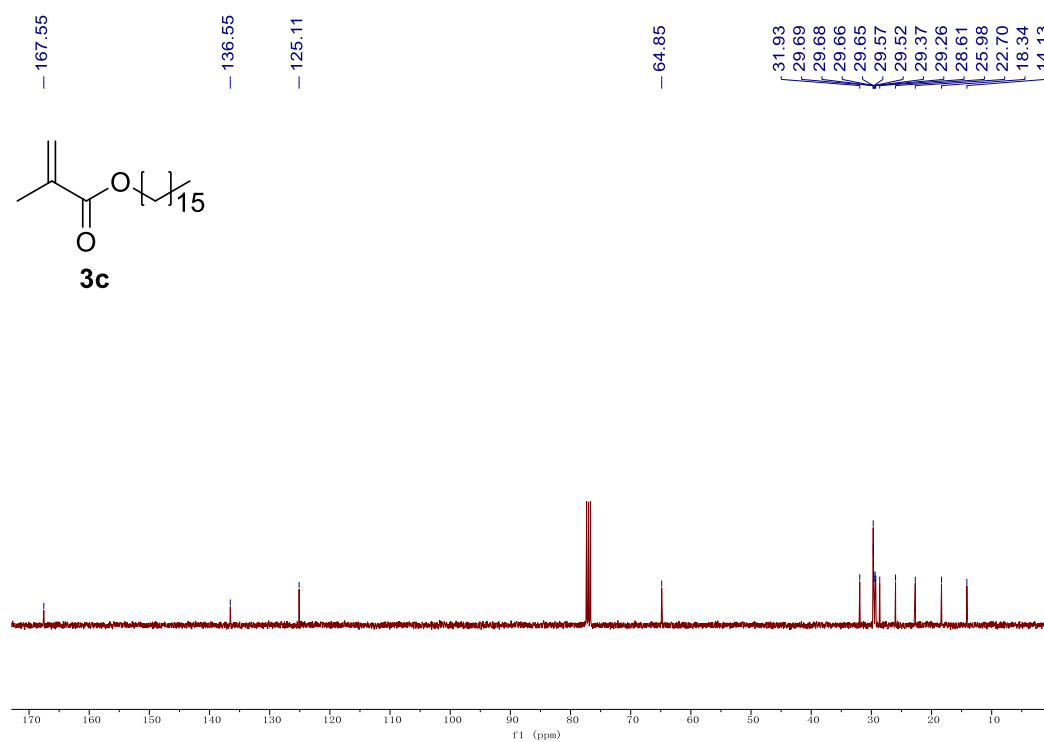

$^1\text{H}$  NMR, 400 MHz,  $\text{CDCl}_3$

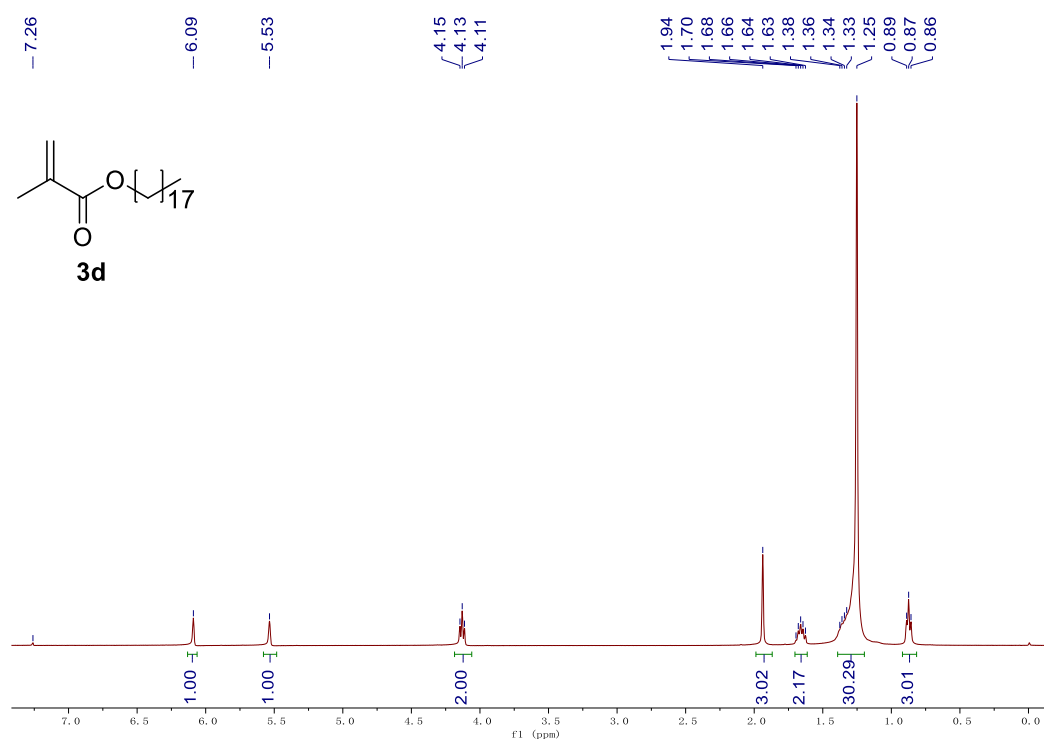

$^{13}\text{C}$  NMR, 101 MHz,  $\text{CDCl}_3$

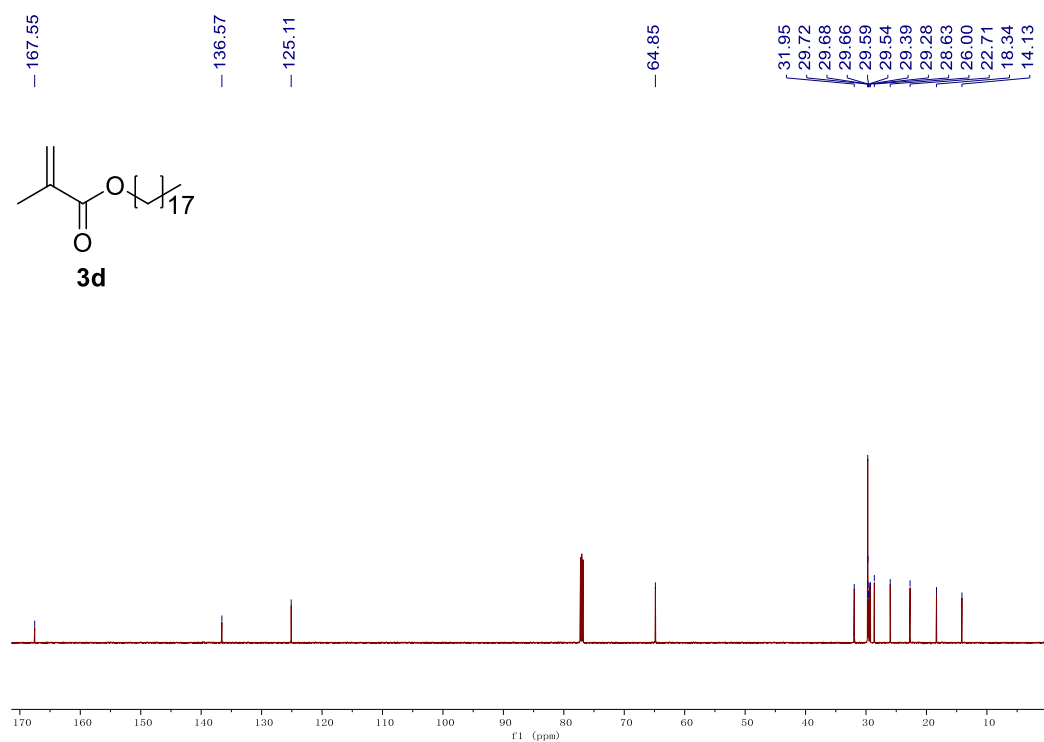

$^1\text{H}$  NMR, 400 MHz,  $\text{CDCl}_3$

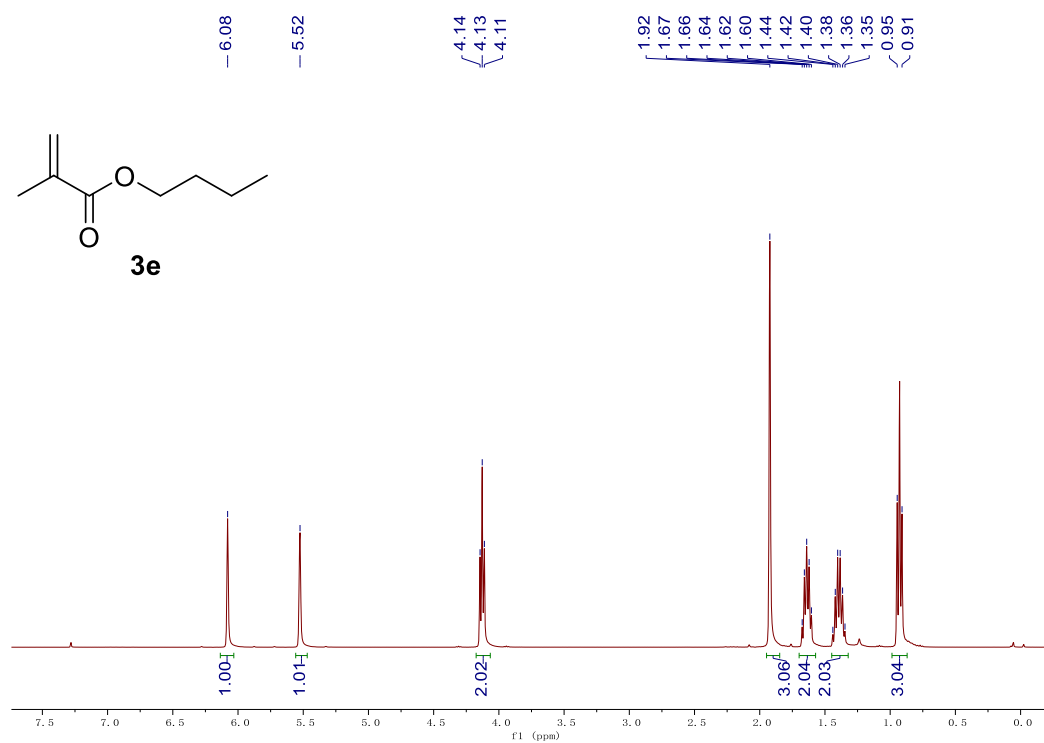

$^{13}\text{C}$  NMR, 101 MHz,  $\text{CDCl}_3$

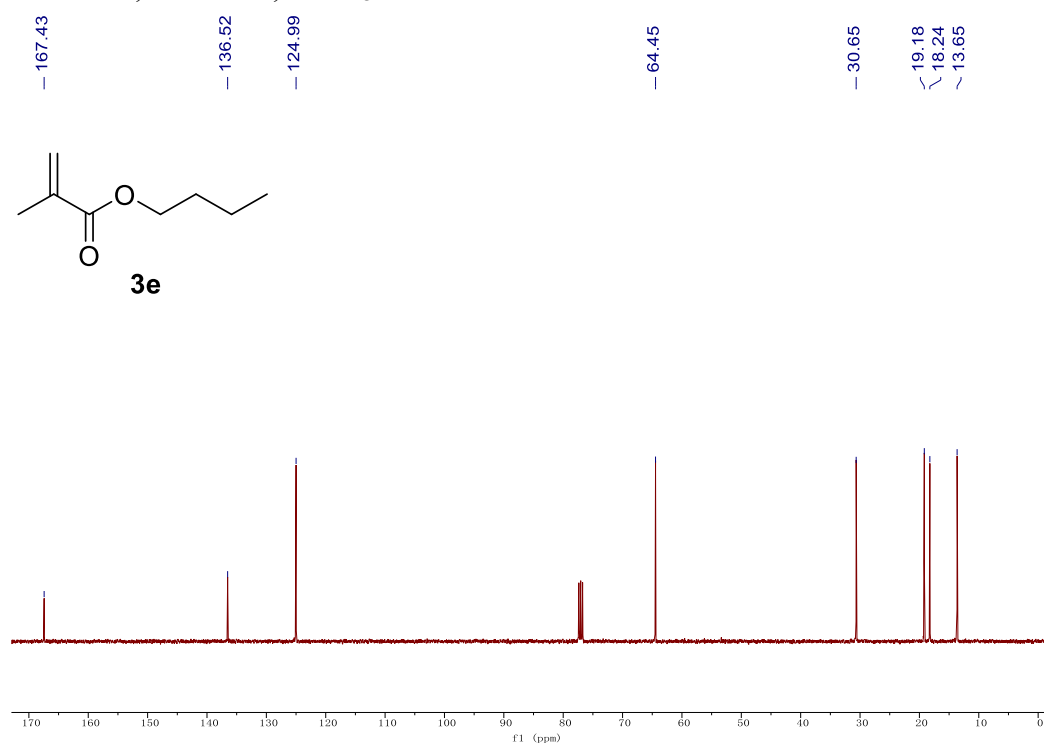

$^1\text{H}$  NMR, 400 MHz,  $\text{CDCl}_3$

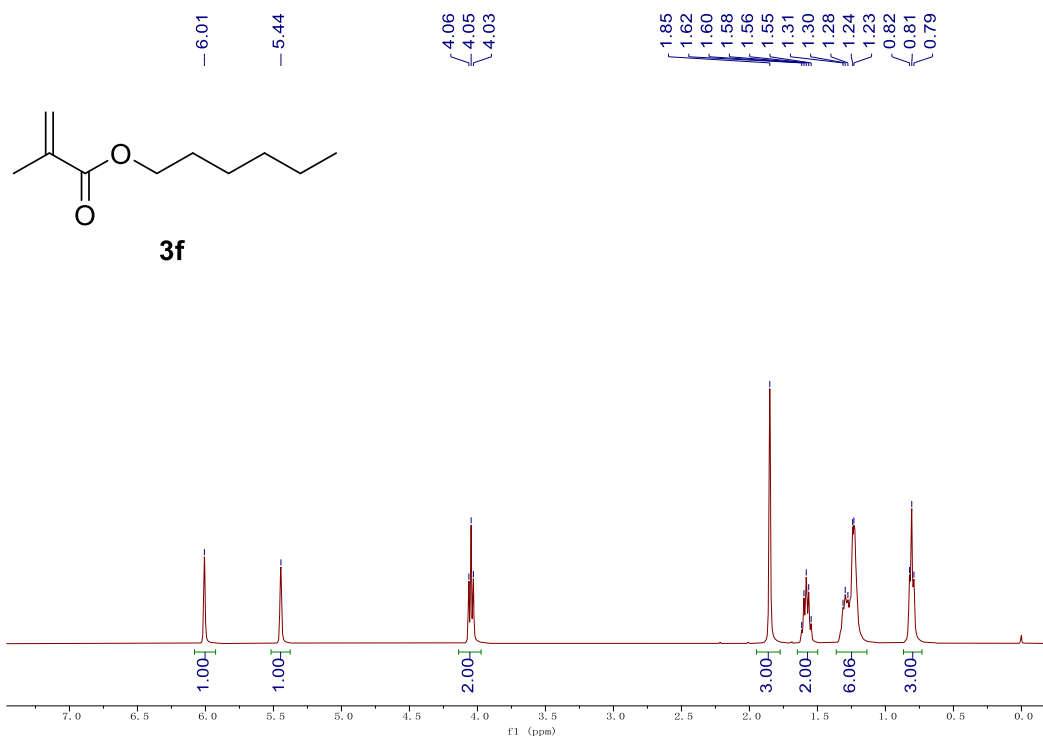

$^{13}\text{C}$  NMR, 101 MHz,  $\text{CDCl}_3$

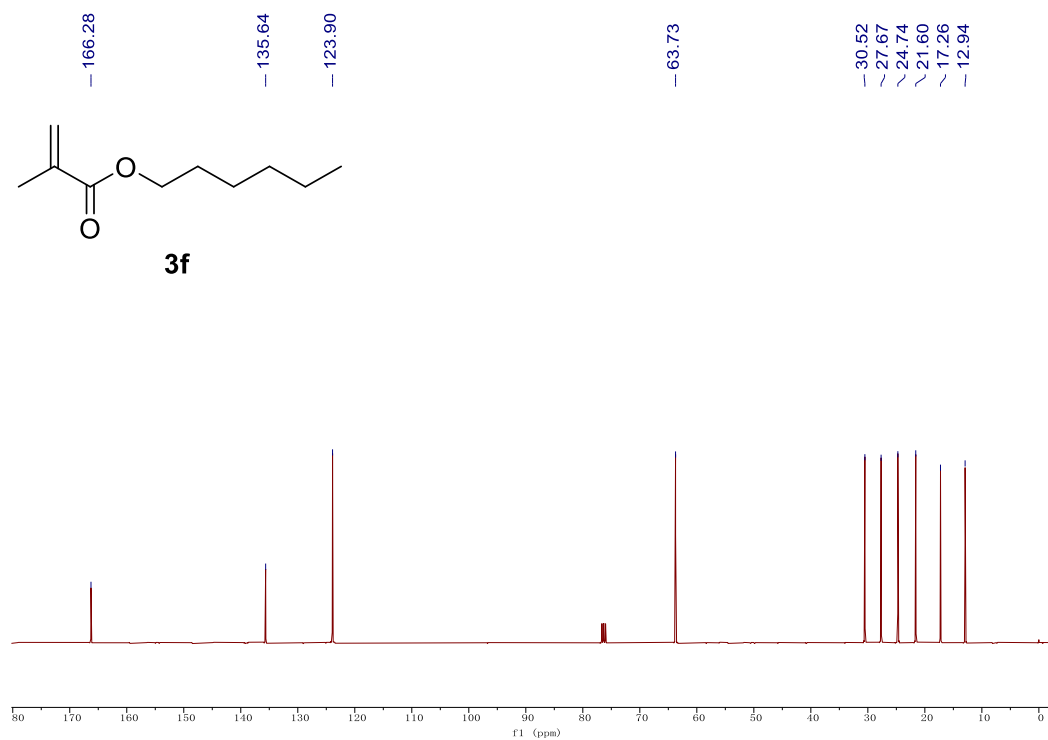

$^1\text{H}$  NMR, 400 MHz,  $\text{CDCl}_3$

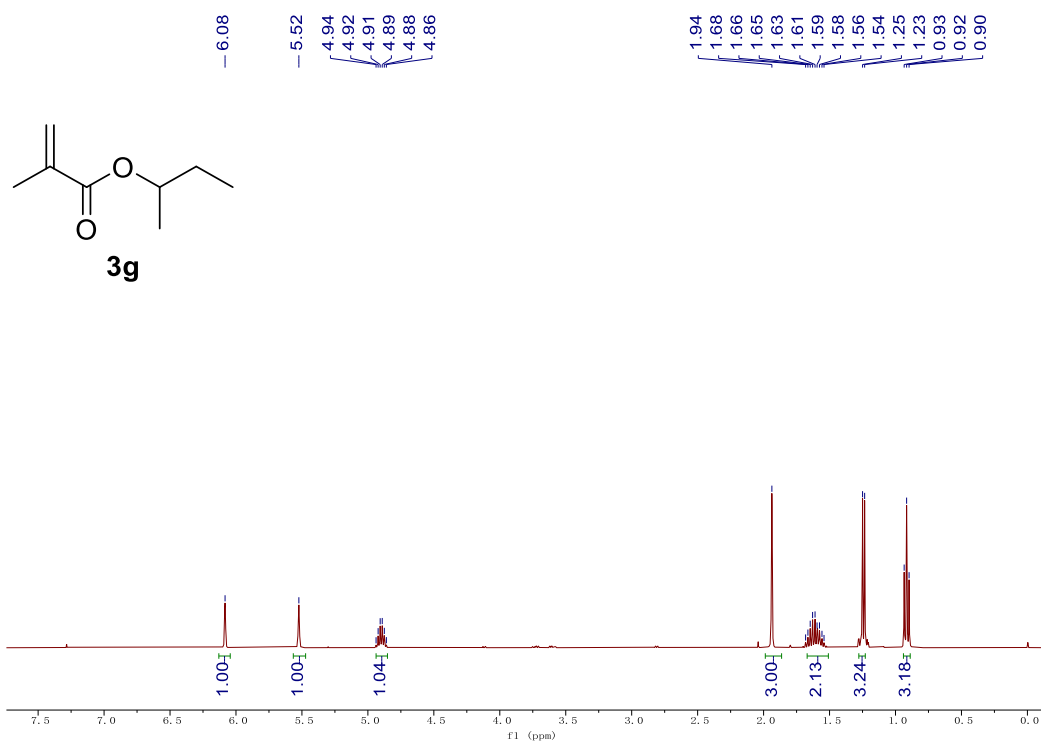

$^{13}\text{C}$  NMR, 101 MHz,  $\text{CDCl}_3$

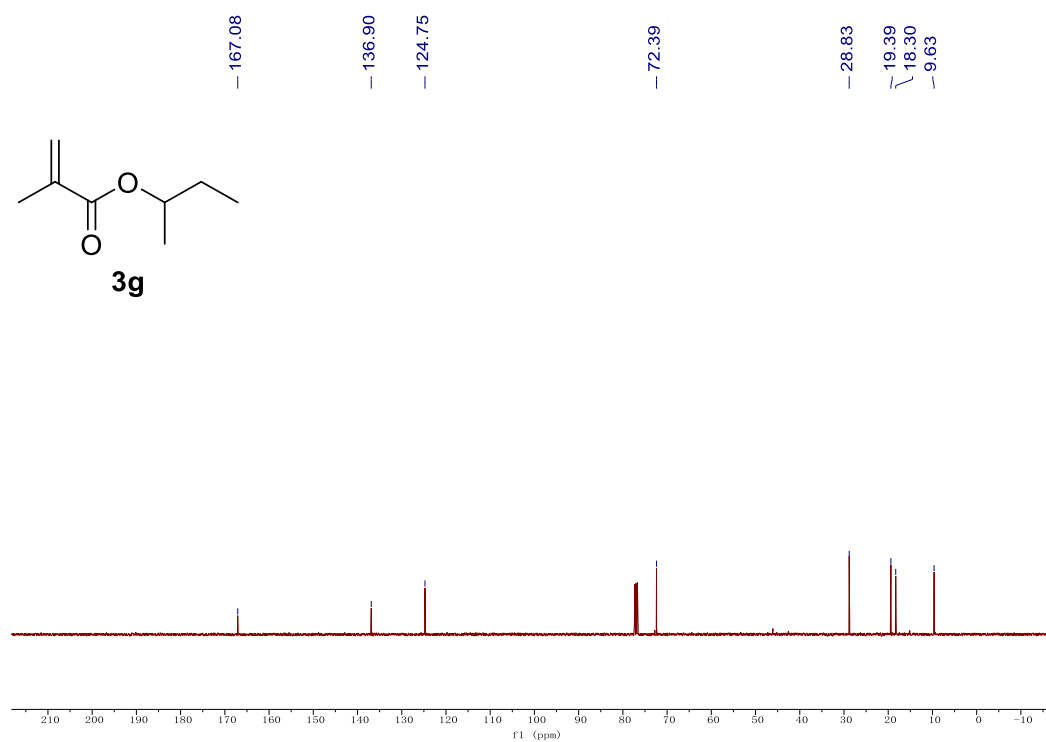

$^1\text{H}$  NMR, 400 MHz,  $\text{CDCl}_3$

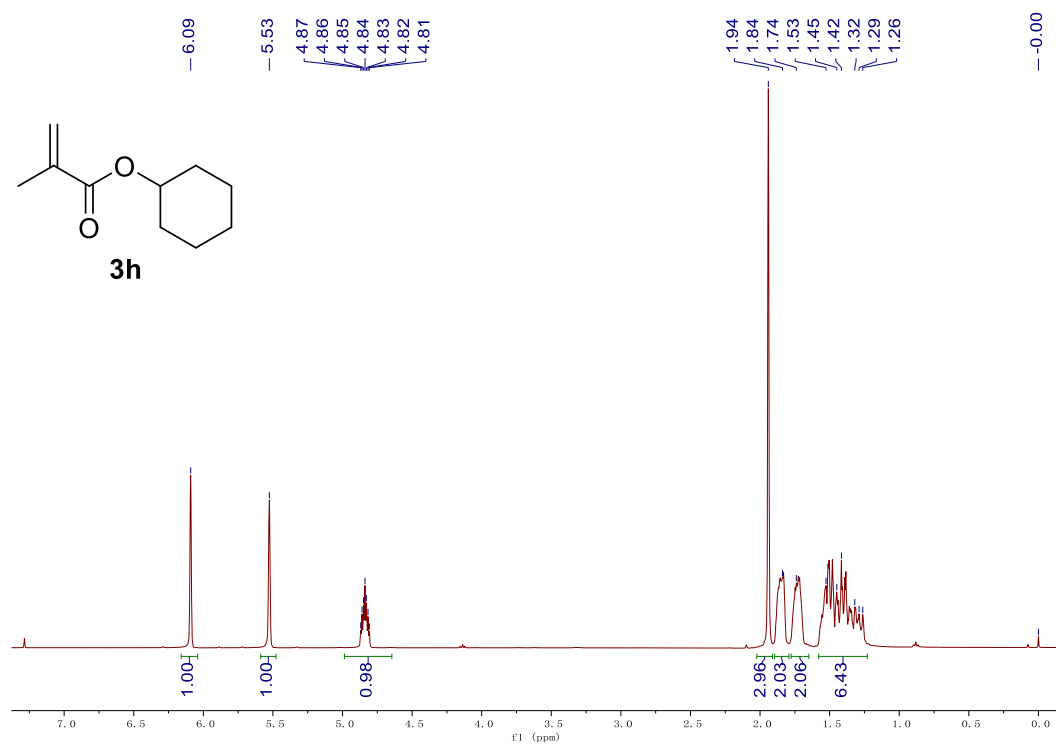

$^{13}\text{C}$  NMR, 101 MHz,  $\text{CDCl}_3$

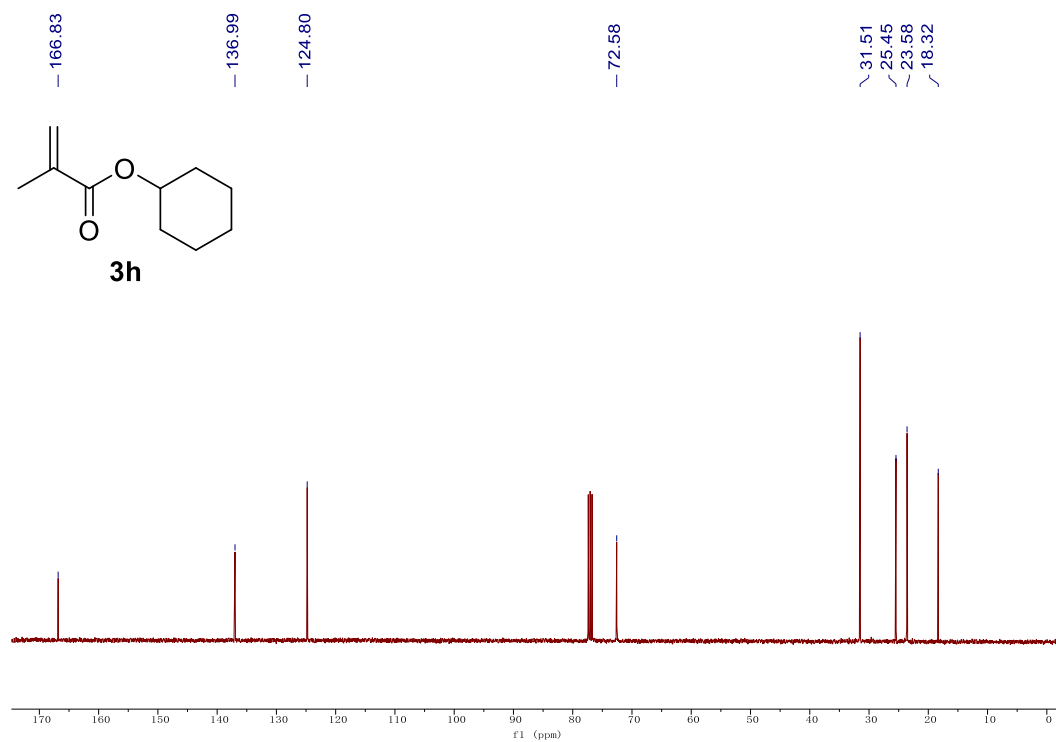



$^1\text{H}$  NMR, 400 MHz,  $\text{CDCl}_3$

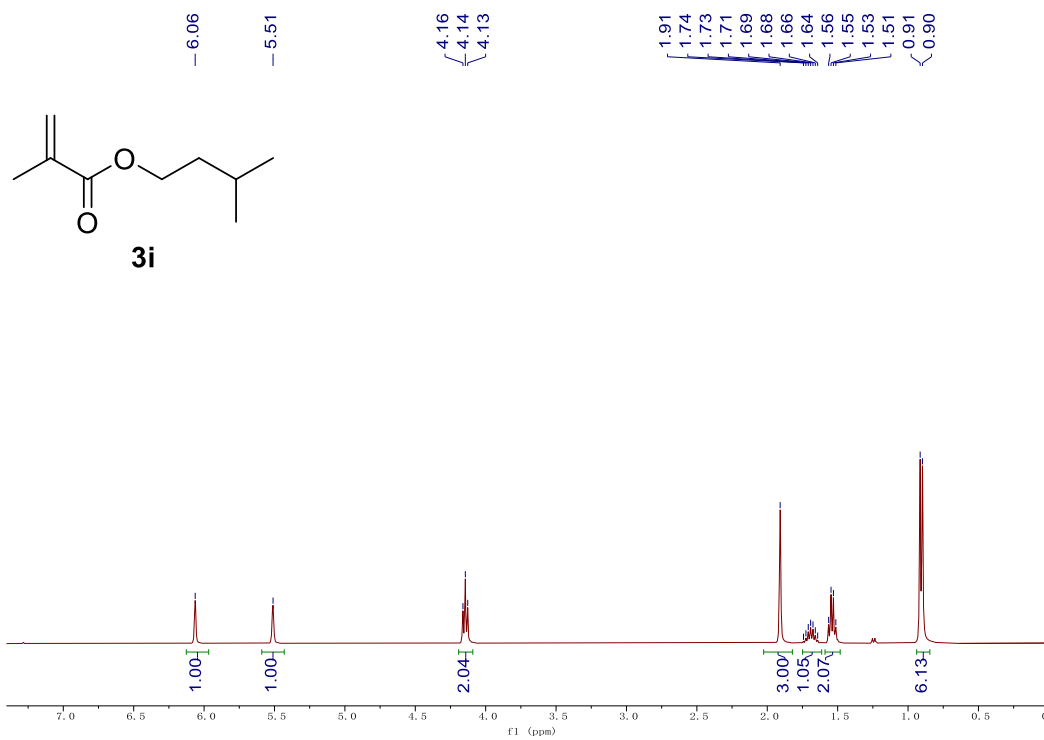

$^{13}\text{C}$  NMR, 101 MHz,  $\text{CDCl}_3$

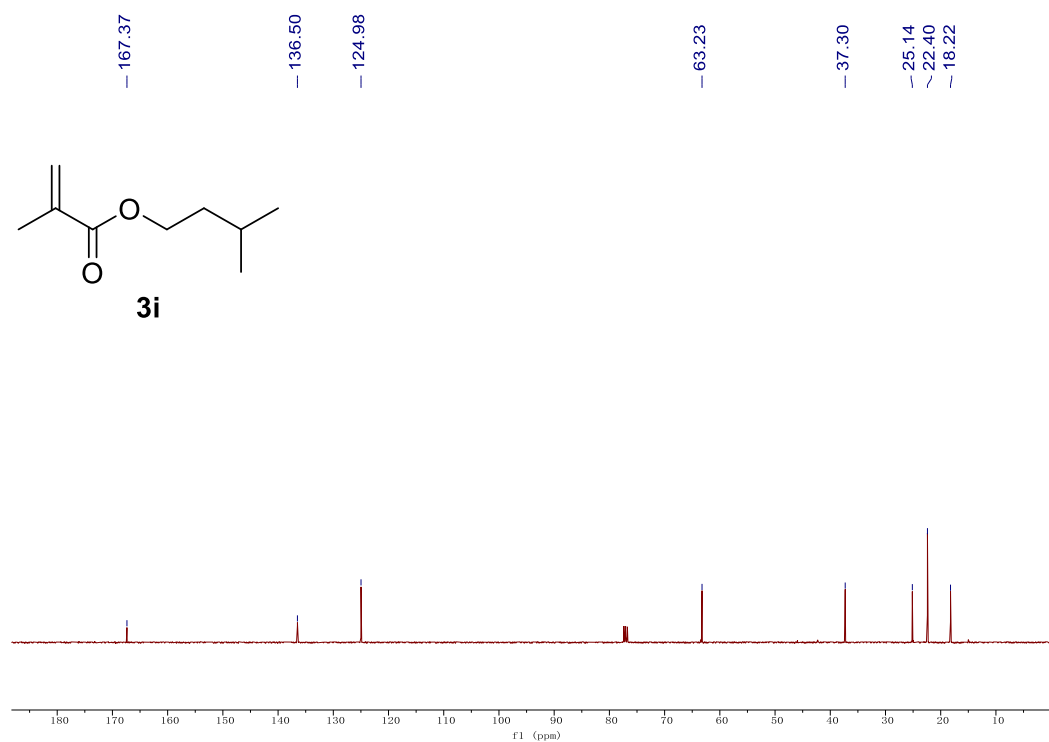

$^1\text{H}$  NMR, 400 MHz,  $\text{CDCl}_3$

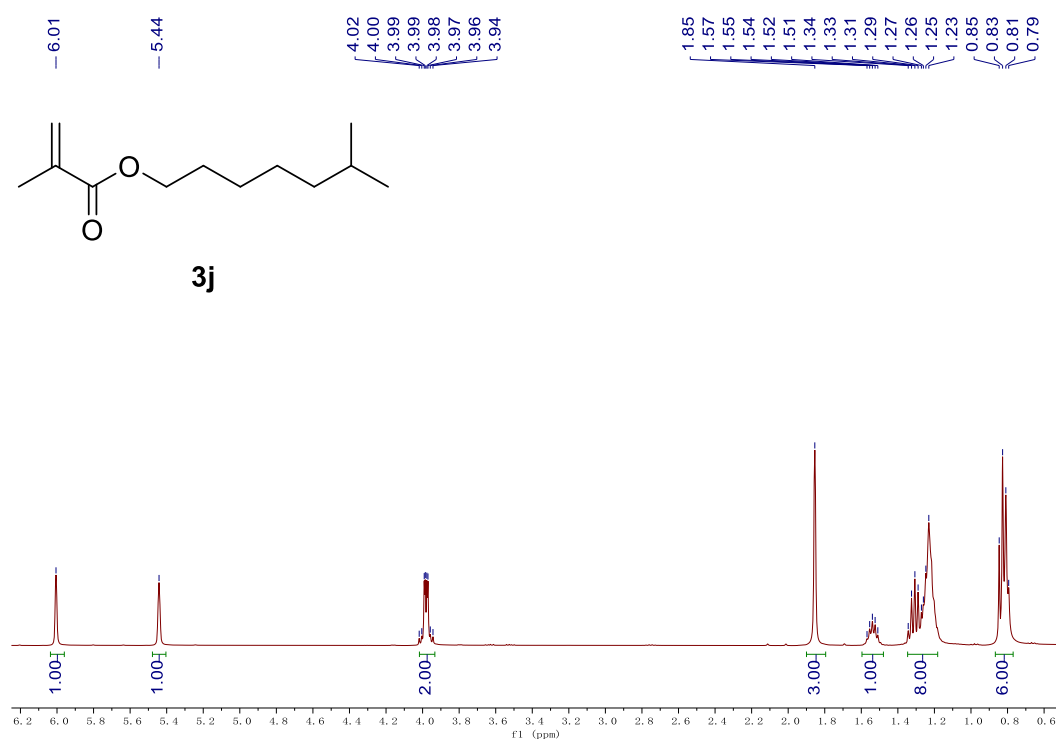

$^{13}\text{C}$  NMR, 101 MHz,  $\text{CDCl}_3$

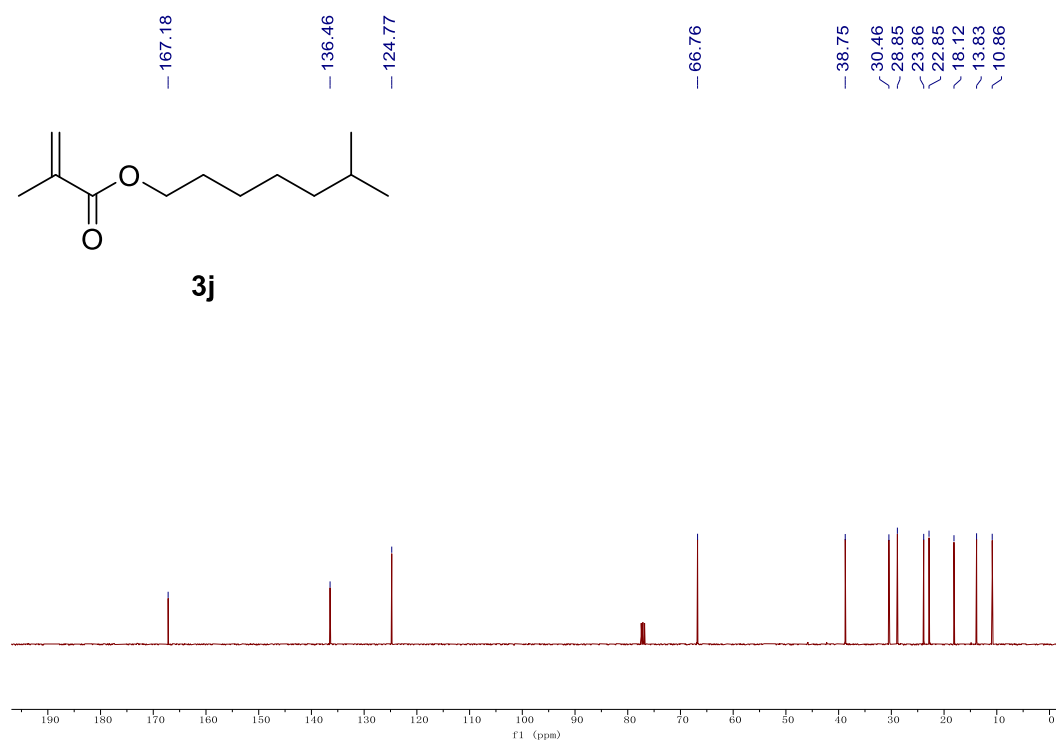

$^1\text{H}$  NMR, 400 MHz,  $\text{CDCl}_3$

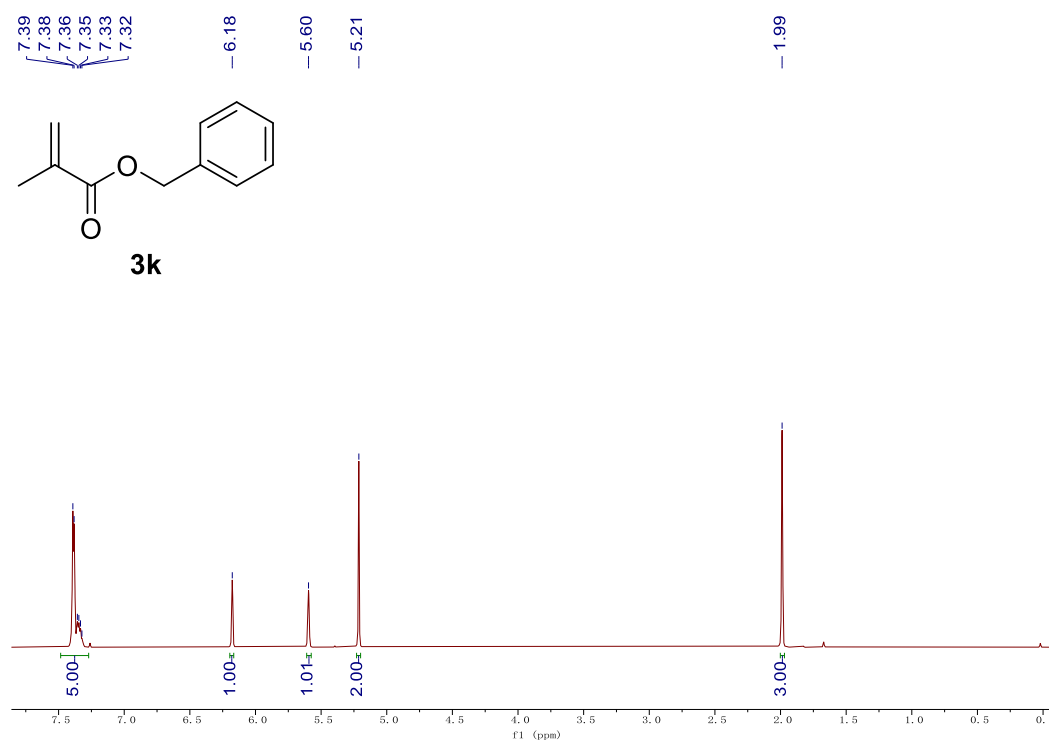

$^{13}\text{C}$  NMR, 101 MHz,  $\text{CDCl}_3$

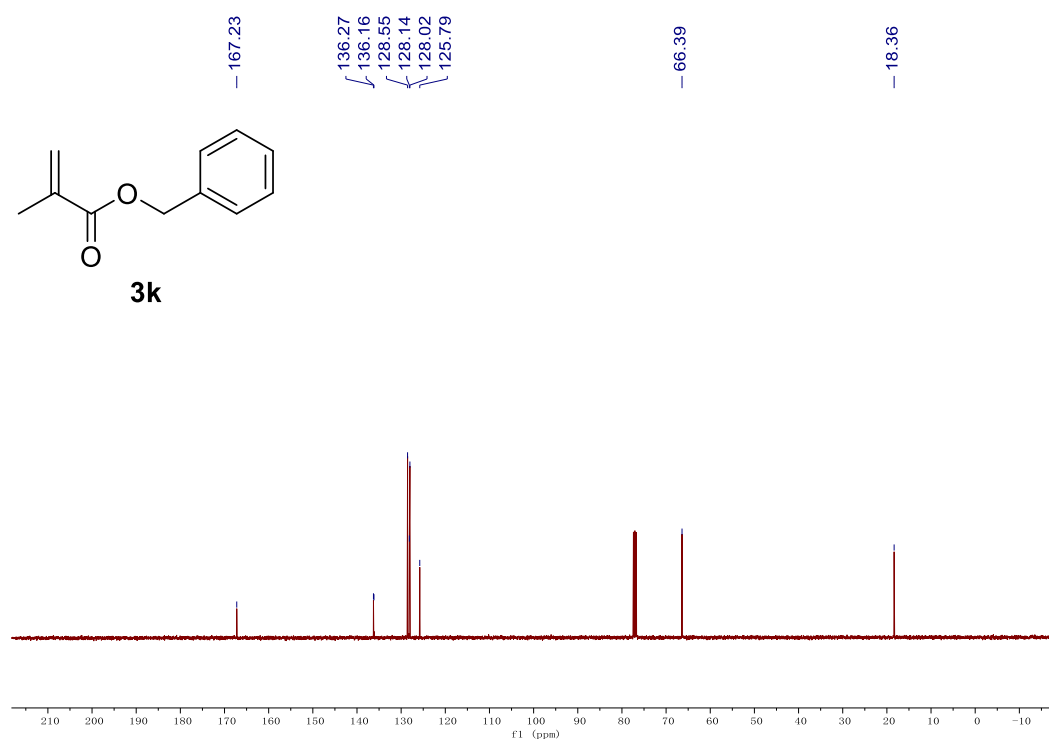

$^1\text{H}$  NMR, 400 MHz,  $\text{CDCl}_3$

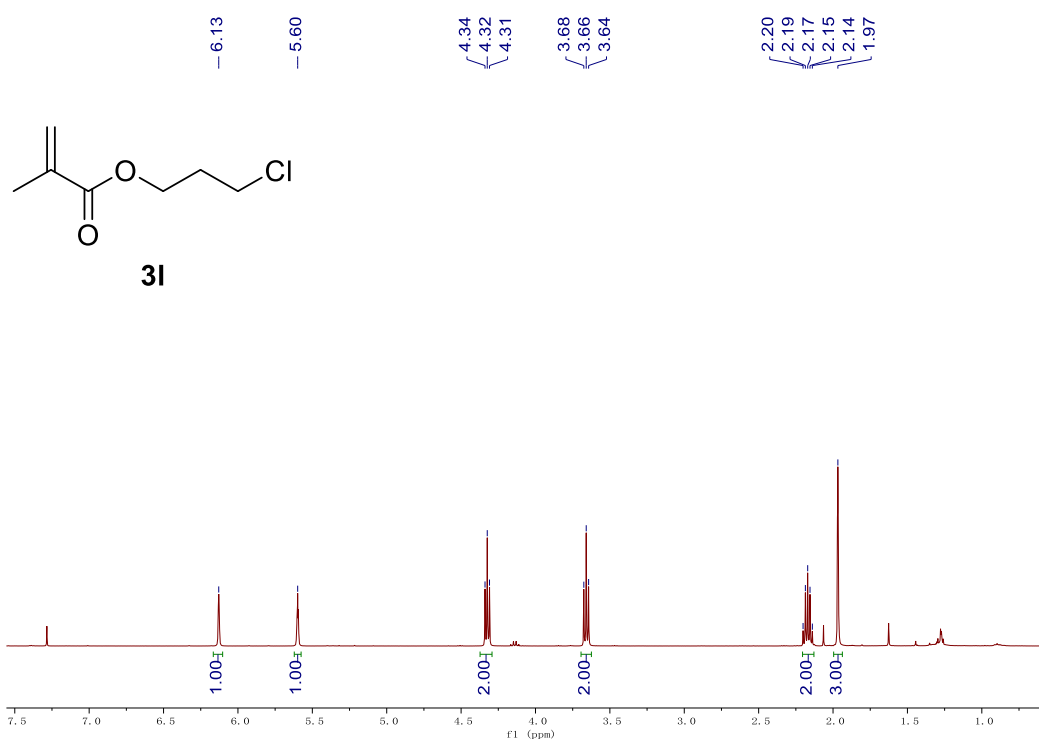

$^{13}\text{C}$  NMR, 101 MHz,  $\text{CDCl}_3$

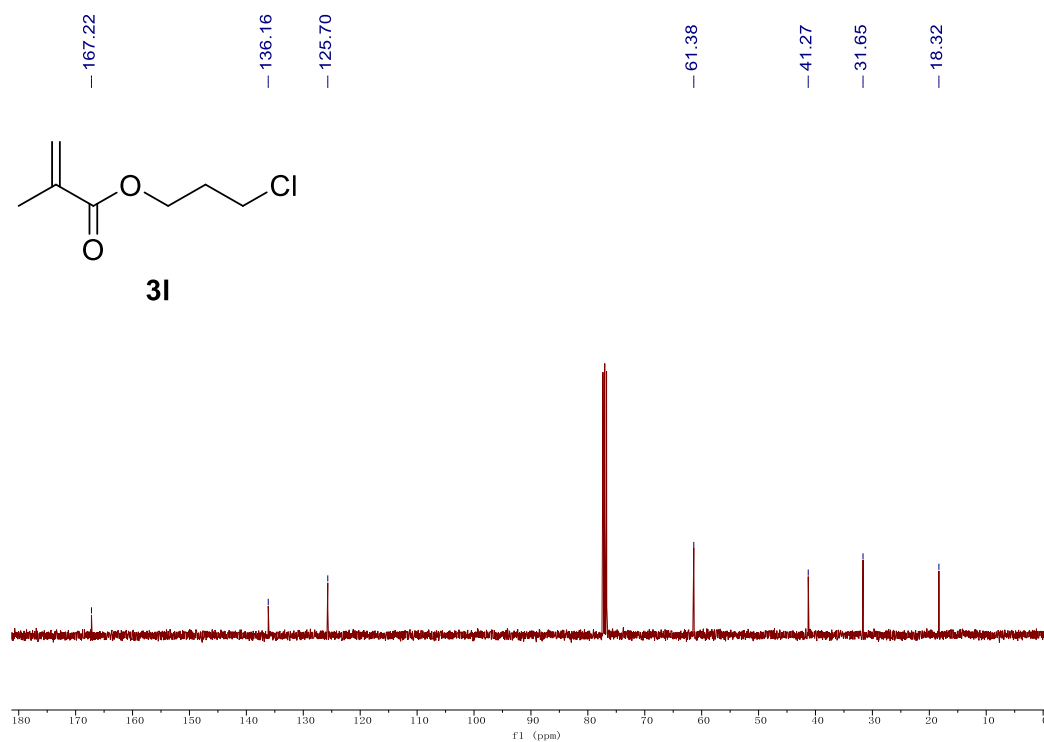

$^1\text{H}$  NMR, 400 MHz,  $\text{CDCl}_3$

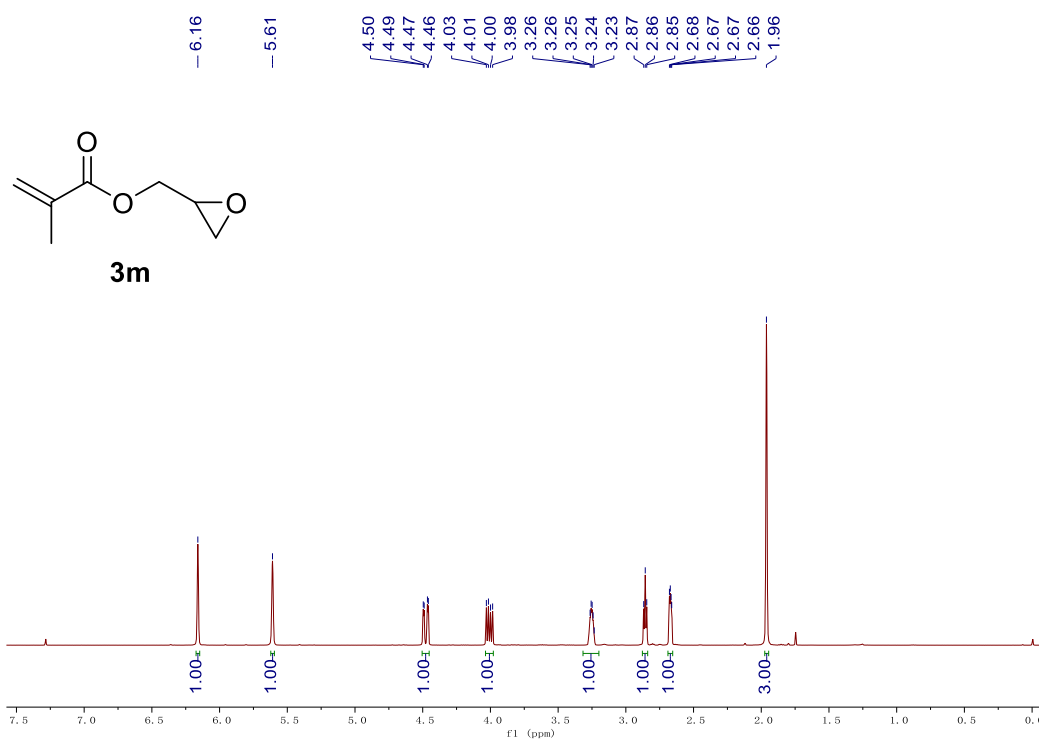

$^{13}\text{C}$  NMR, 101 MHz,  $\text{CDCl}_3$

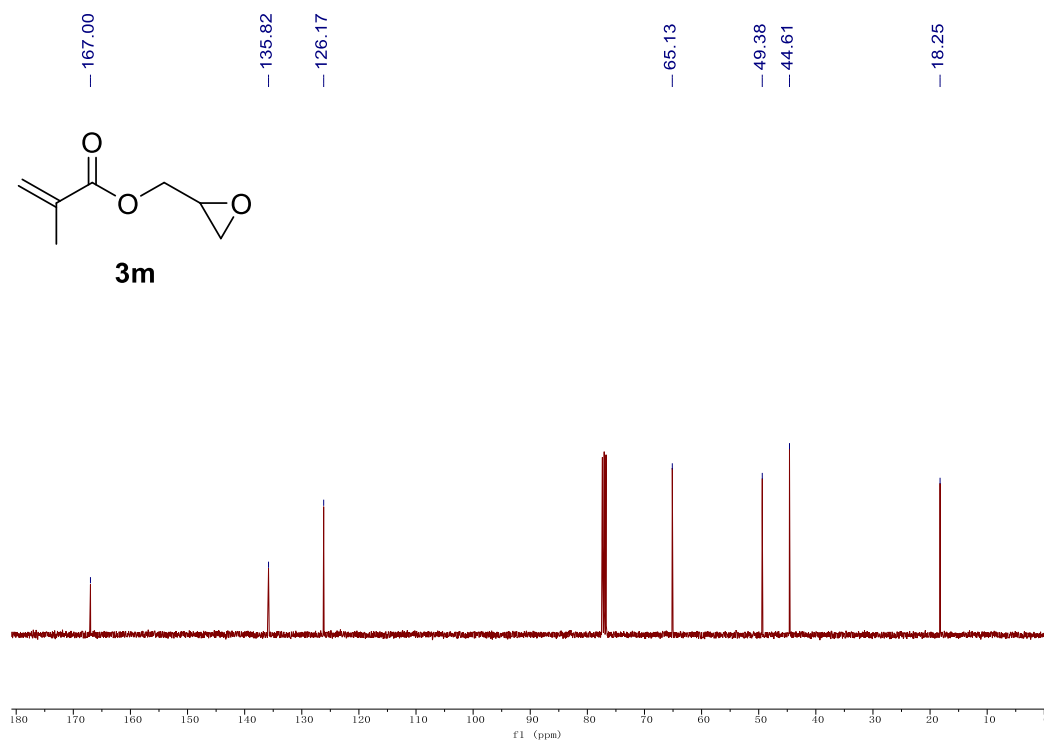

$^1\text{H}$  NMR, 400 MHz,  $\text{CDCl}_3$

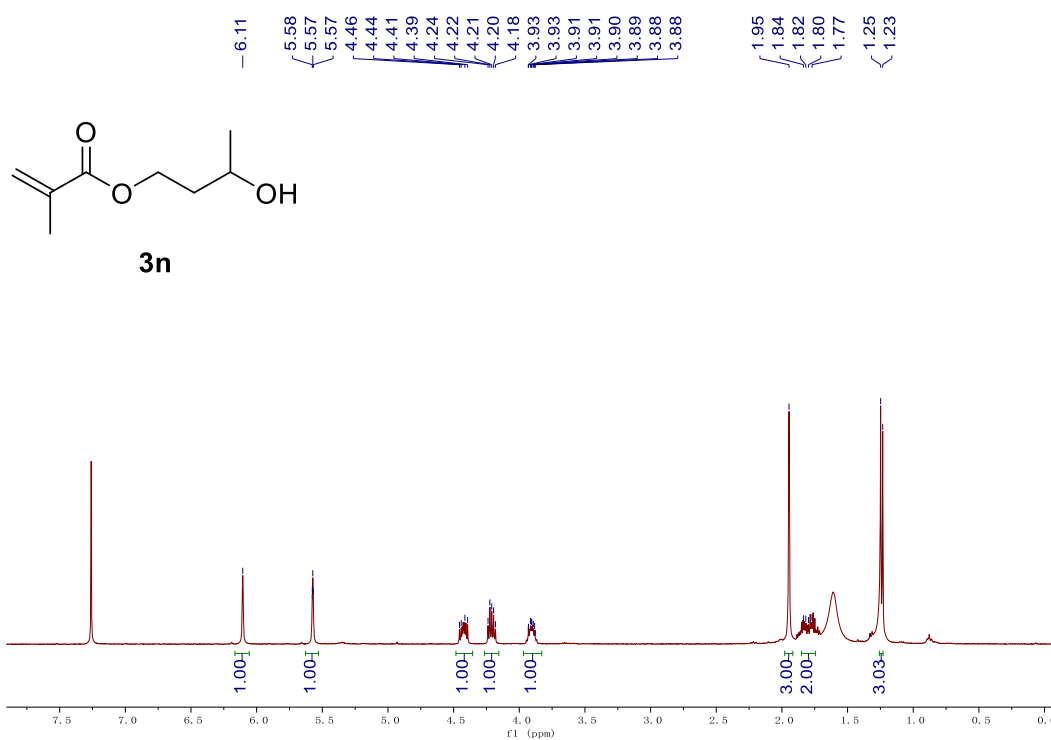

$^{13}\text{C}$  NMR, 101 MHz,  $\text{CDCl}_3$

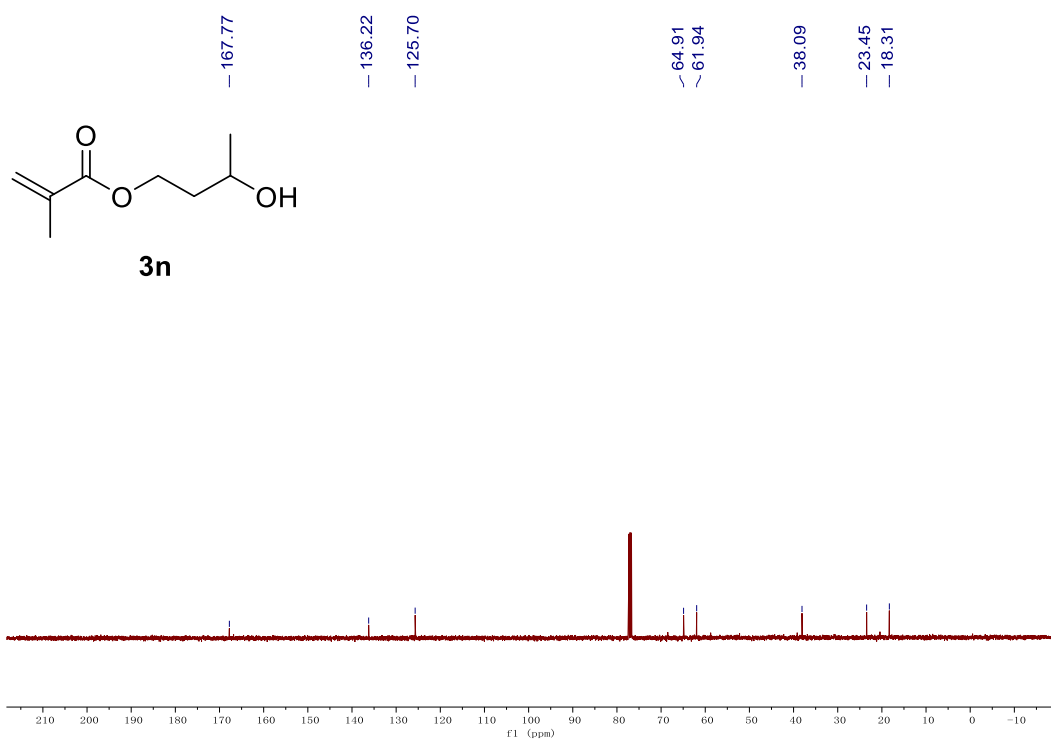

$^1\text{H}$  NMR, 400 MHz,  $\text{CDCl}_3$

6.10, 5.57, 5.21, 5.20, 5.19, 5.18, 5.17, 5.17, 5.16, 5.15, 5.13, 3.69, 3.67, 3.66, 3.65, 3.63, 3.61, 3.60, 3.59, 3.58, 3.58, 3.57, 3.56, 3.55, 1.94, 1.32, 1.31, 1.24, 1.23

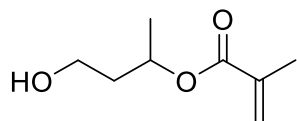

**3n'(mixed with 3n)**

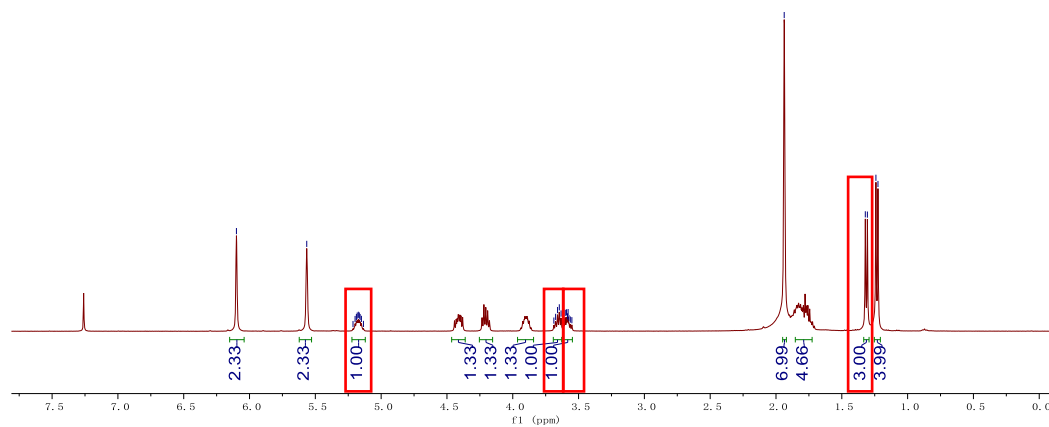

$^{13}\text{C}$  NMR, 101 MHz,  $\text{CDCl}_3$

167.77, 136.42, 125.70, 68.48, 68.79, 39.19, 23.46, 20.45

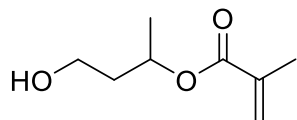

**3n'(mixed with 3n)**

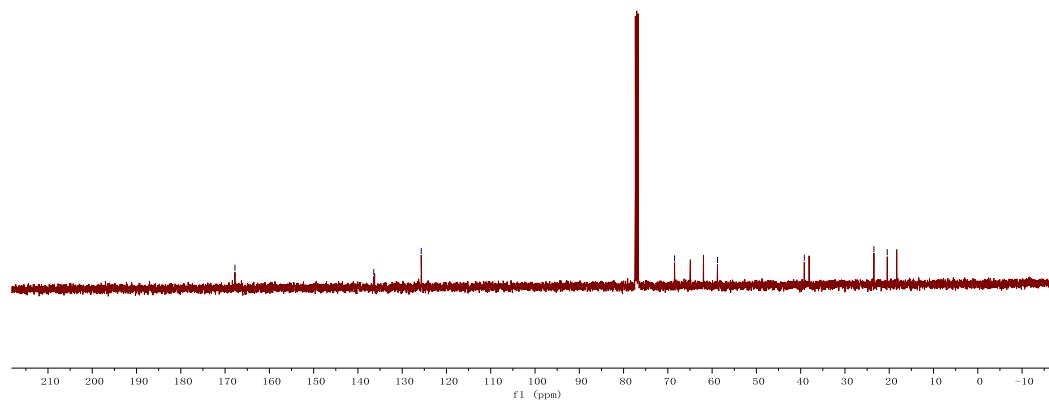

$^1\text{H}$  NMR, 400 MHz,  $\text{CDCl}_3$

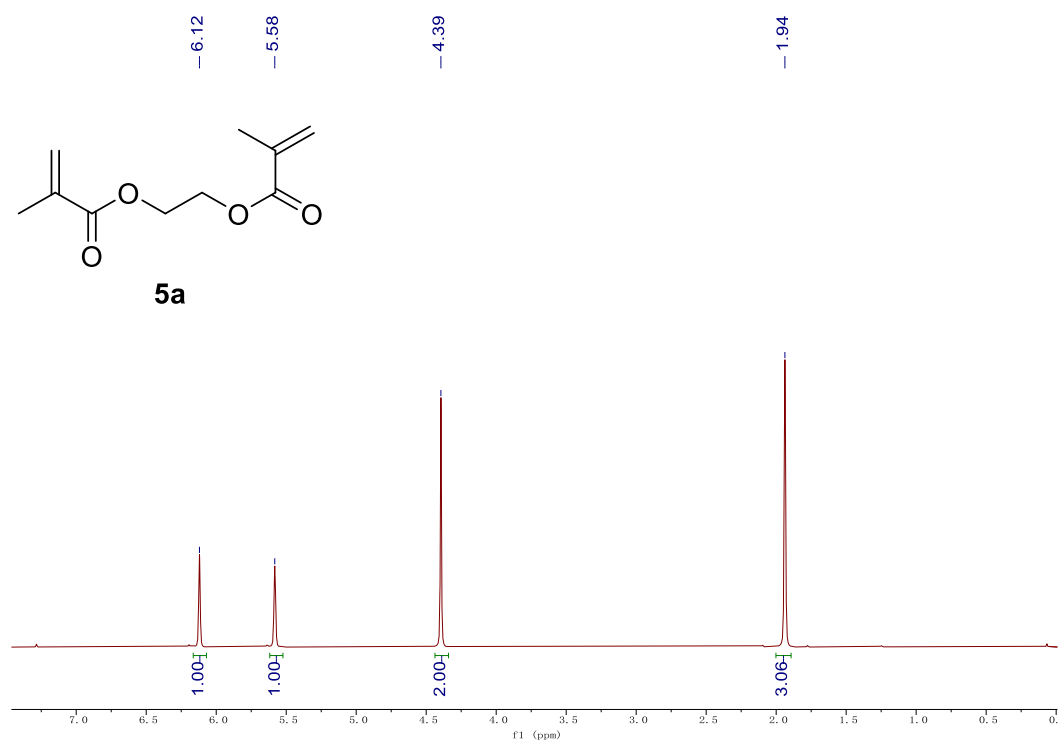

$^{13}\text{C}$  NMR, 101 MHz,  $\text{CDCl}_3$

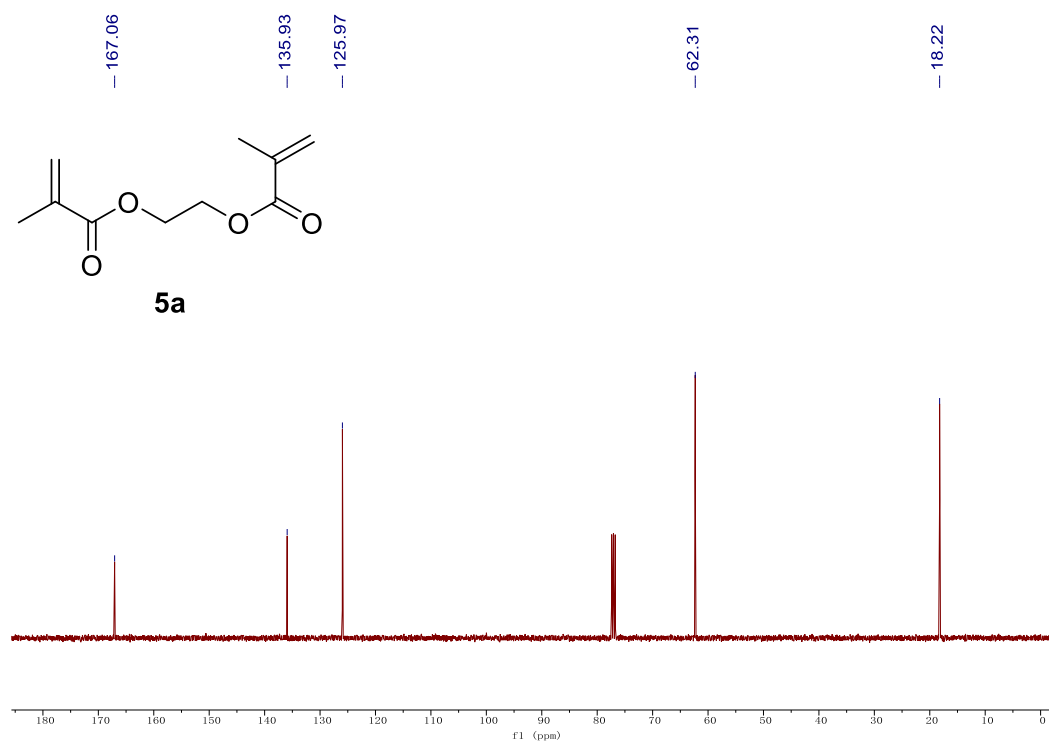



$^1\text{H}$  NMR, 400 MHz,  $\text{CDCl}_3$

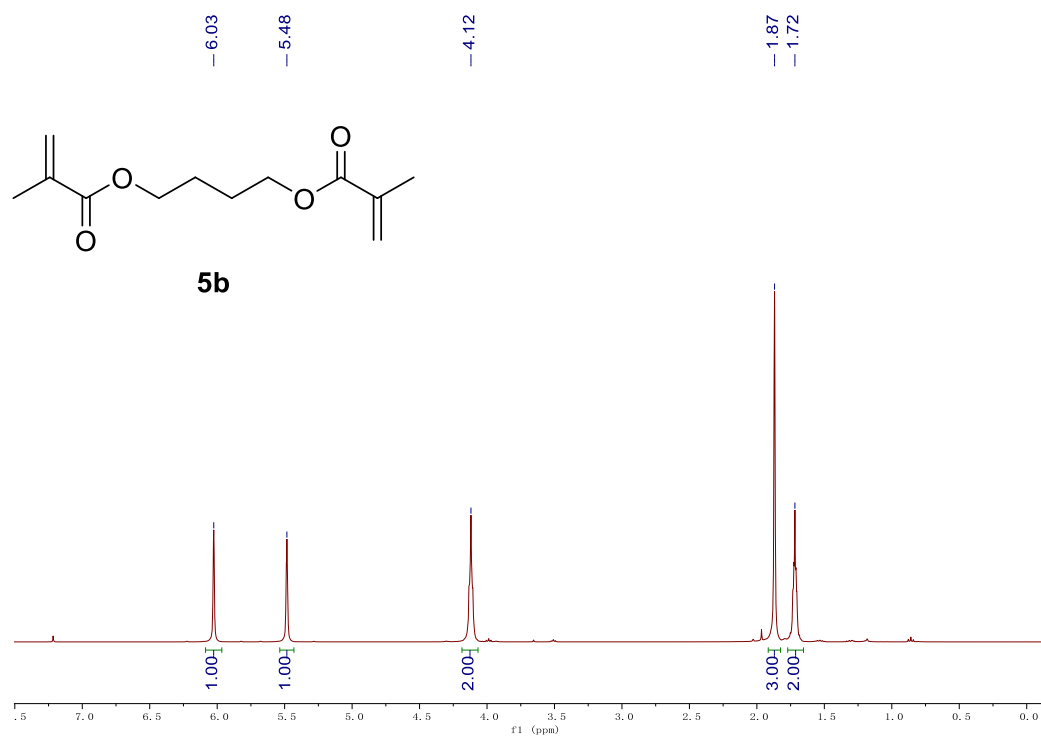

$^{13}\text{C}$  NMR, 101 MHz,  $\text{CDCl}_3$

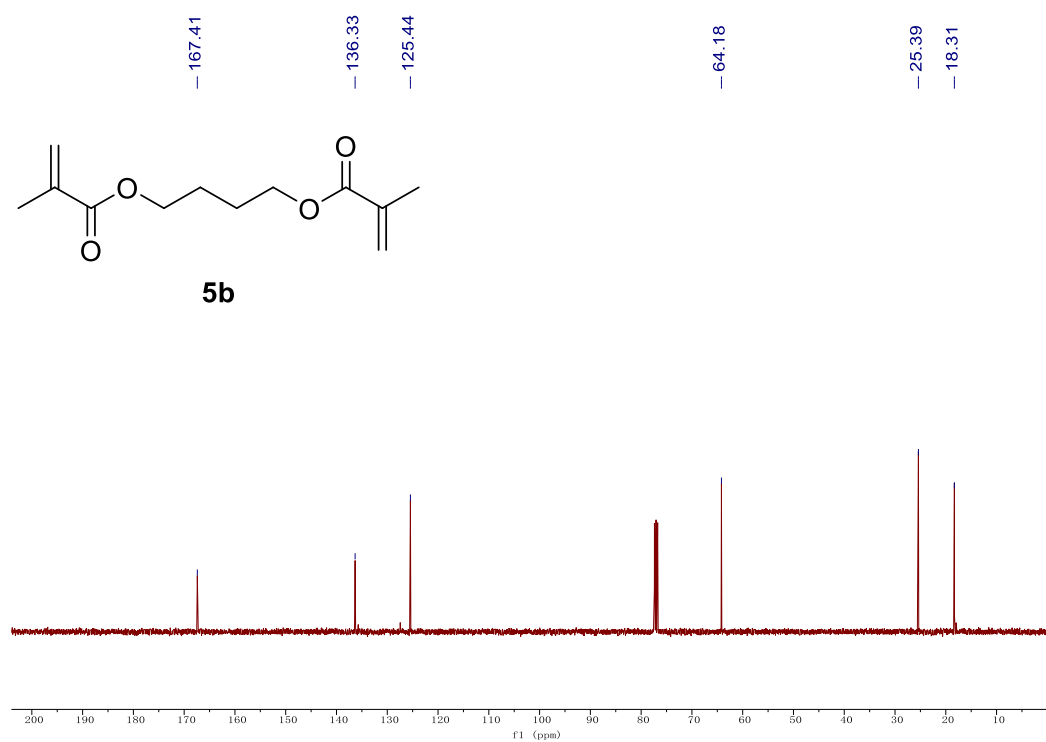

$^1\text{H}$  NMR, 400 MHz,  $\text{CDCl}_3$

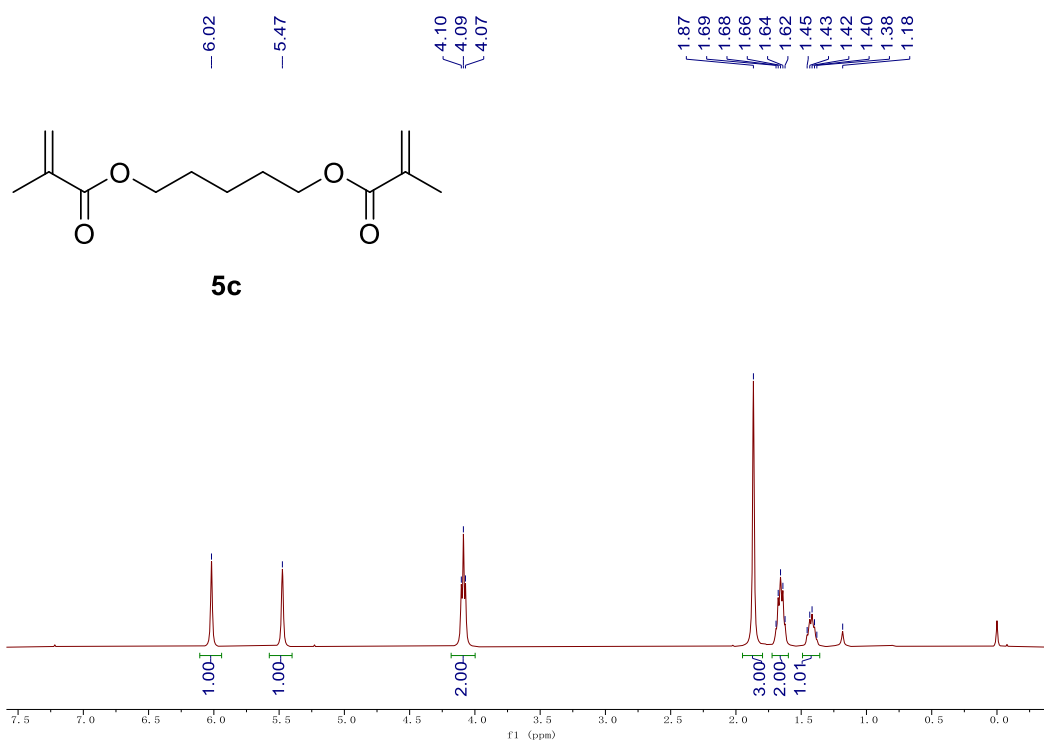

$^{13}\text{C}$  NMR, 101 MHz,  $\text{CDCl}_3$

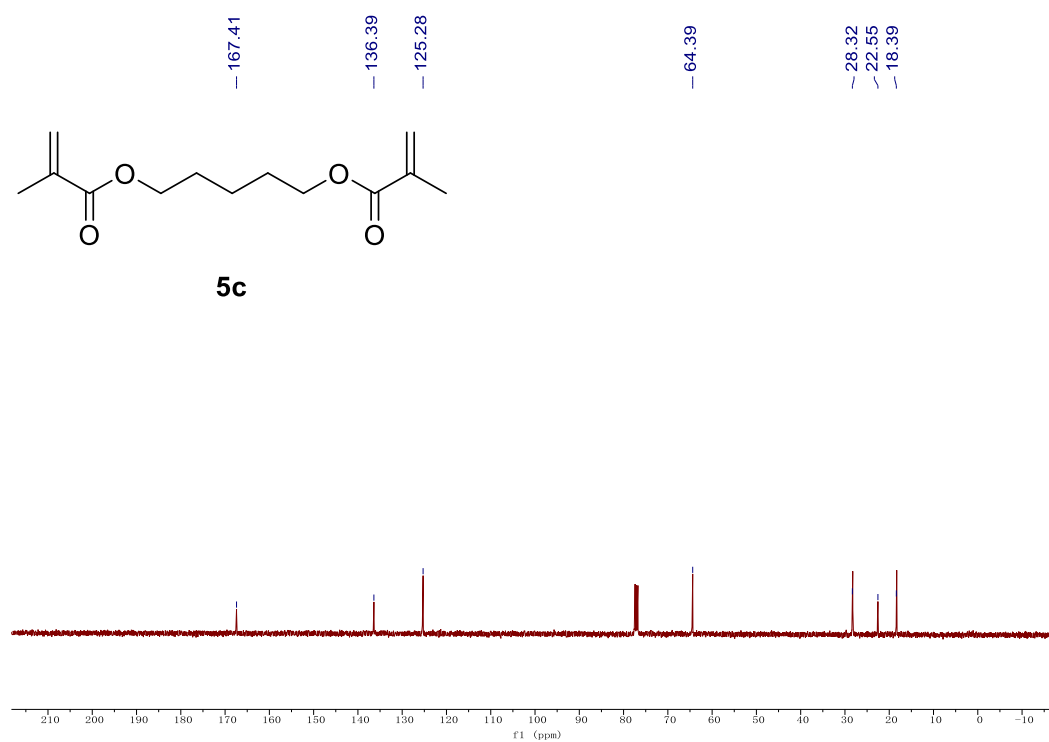

$^1\text{H}$  NMR, 400 MHz,  $\text{CDCl}_3$

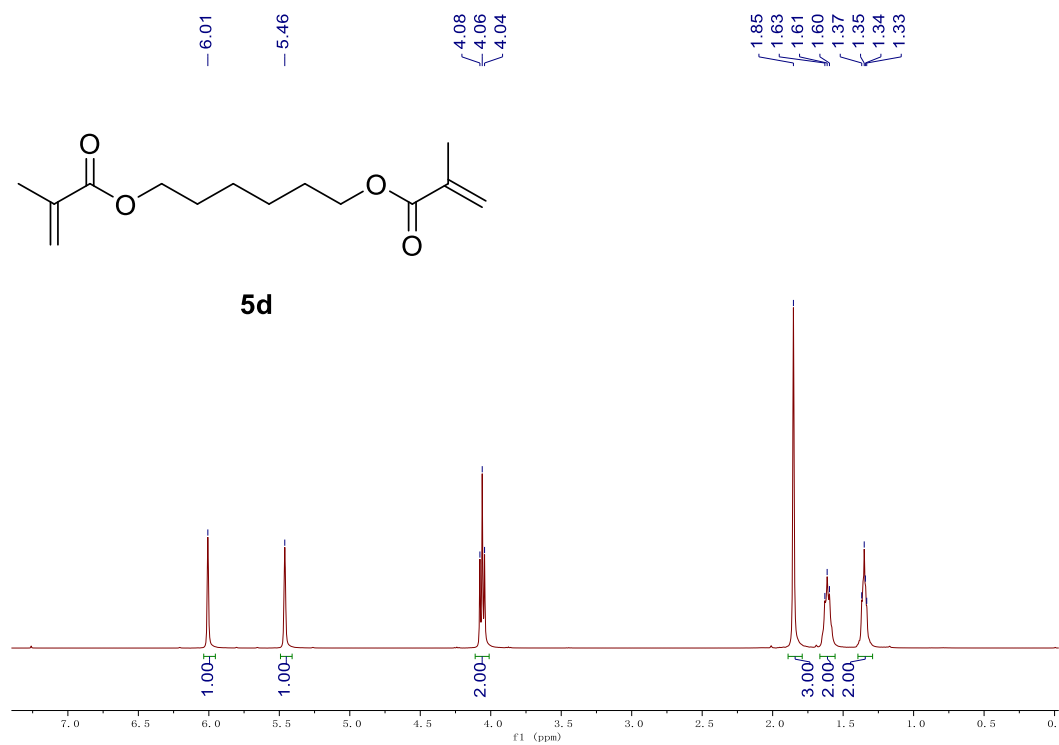

$^{13}\text{C}$  NMR, 101 MHz,  $\text{CDCl}_3$

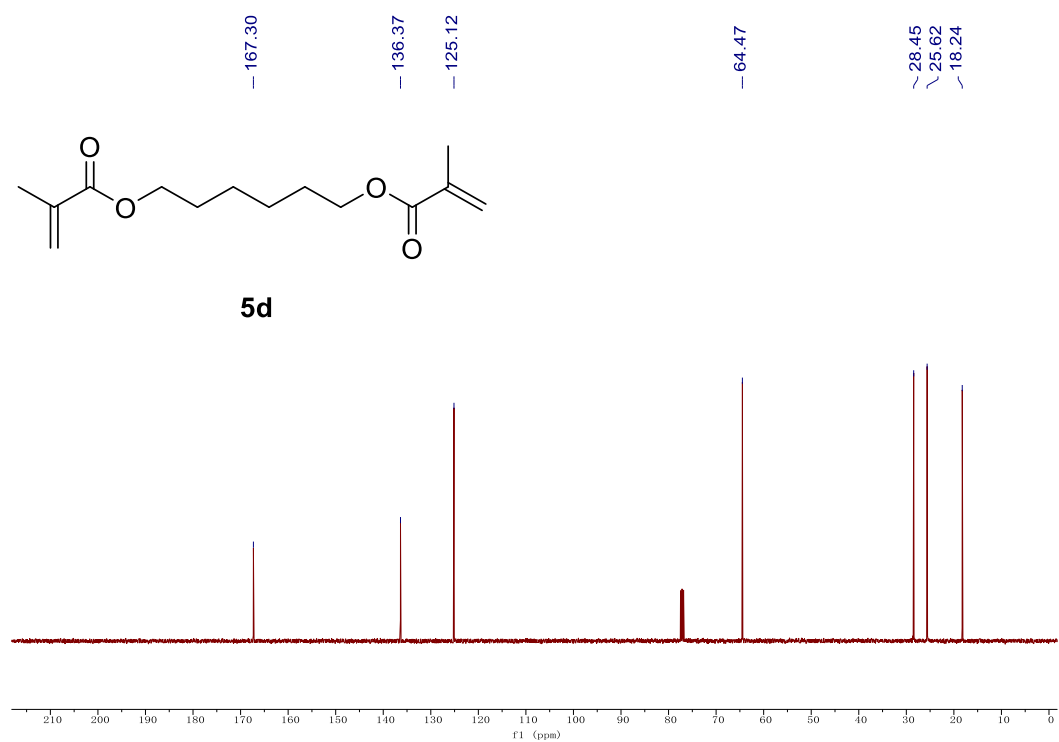

$^1\text{H}$  NMR, 400 MHz,  $\text{CDCl}_3$

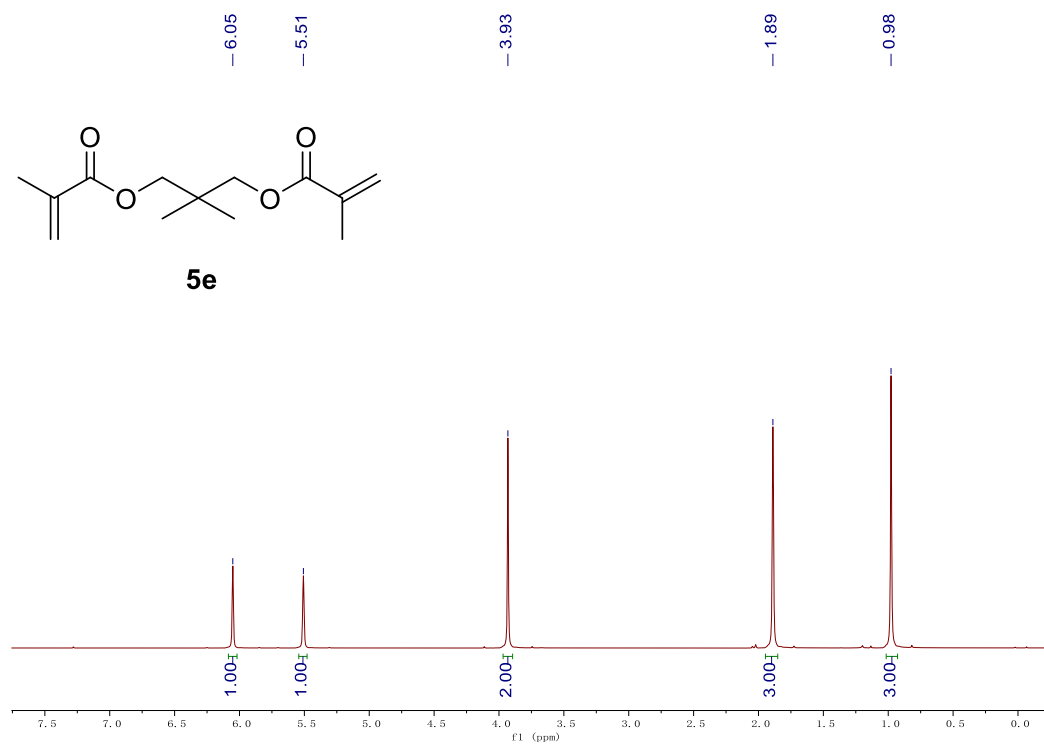

$^{13}\text{C}$  NMR, 101 MHz,  $\text{CDCl}_3$

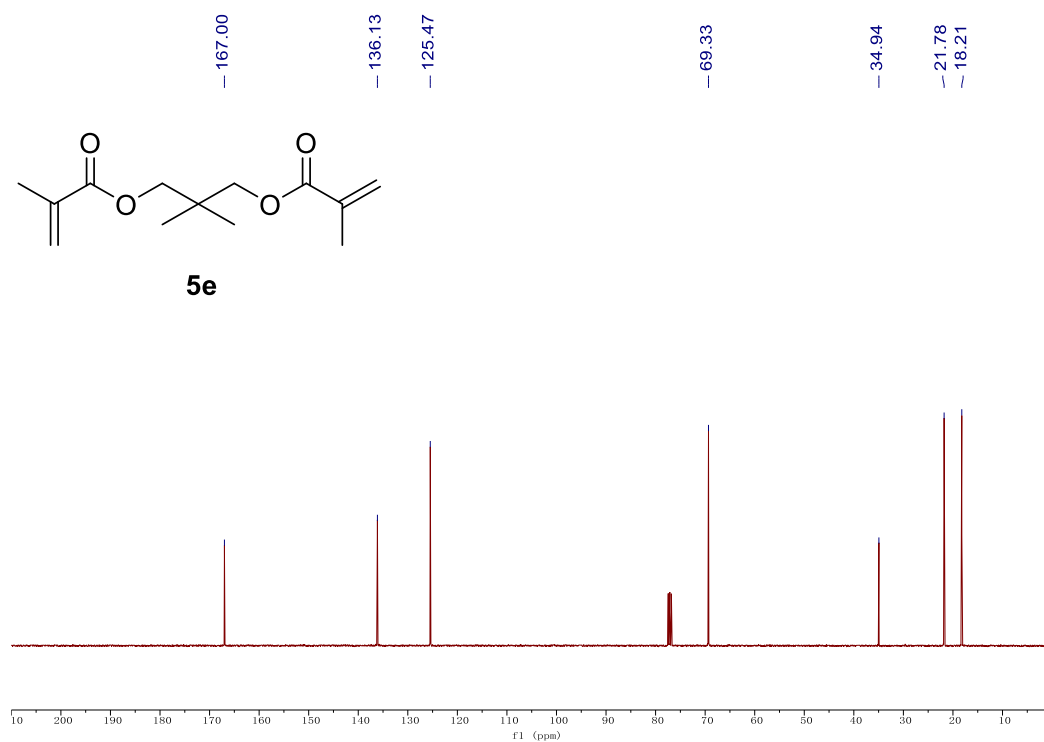

$^1\text{H}$  NMR, 400 MHz,  $\text{CDCl}_3$

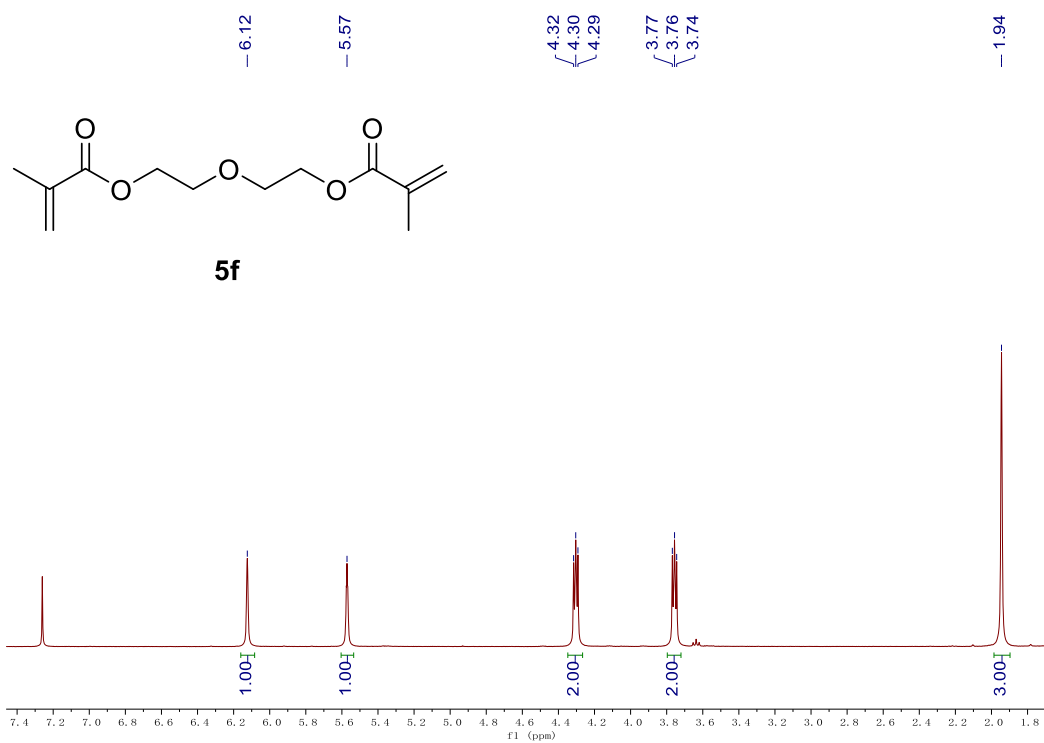

$^{13}\text{C}$  NMR, 101 MHz,  $\text{CDCl}_3$

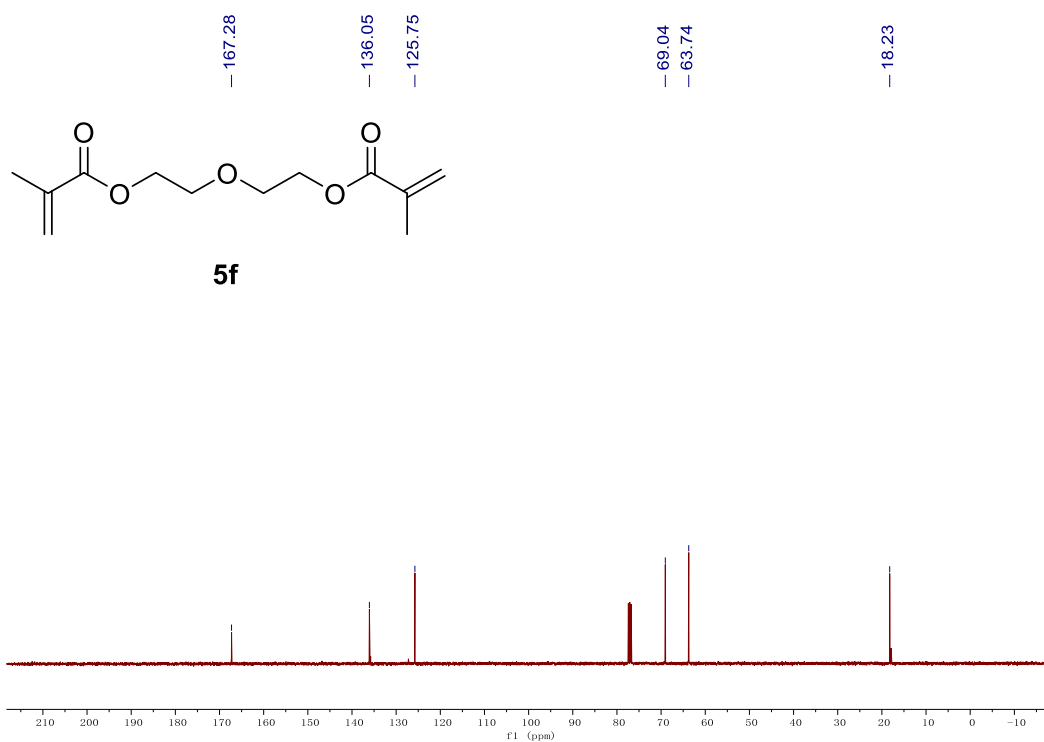

$^1\text{H}$  NMR, 400 MHz,  $\text{CDCl}_3$

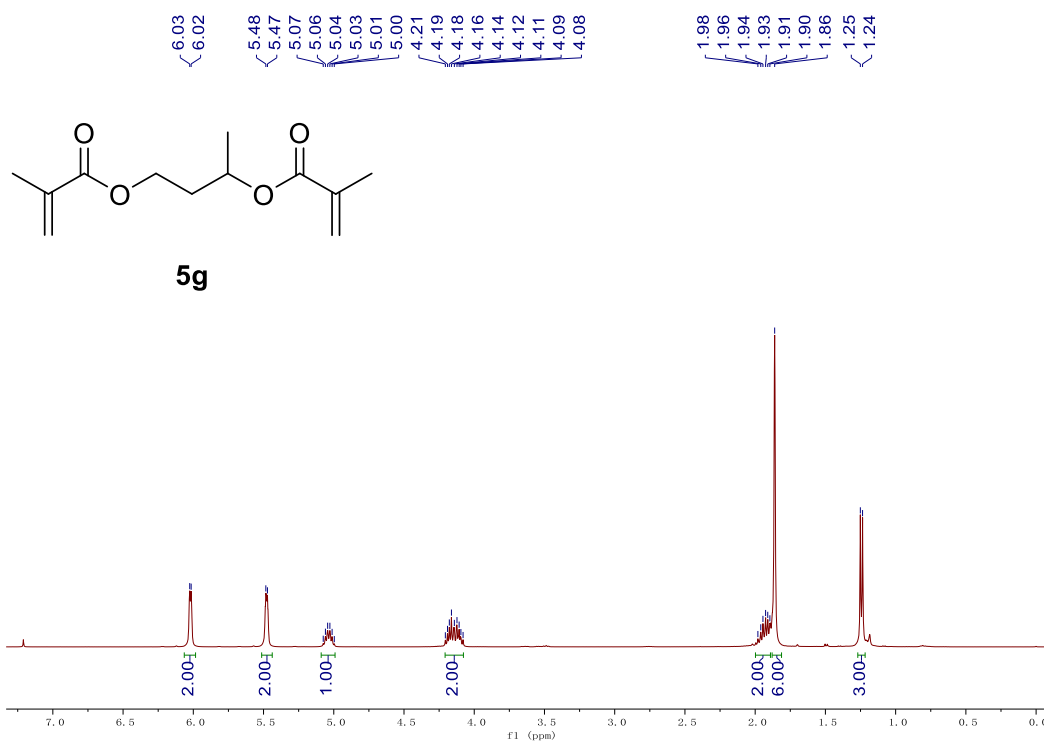

$^{13}\text{C}$  NMR, 101 MHz,  $\text{CDCl}_3$

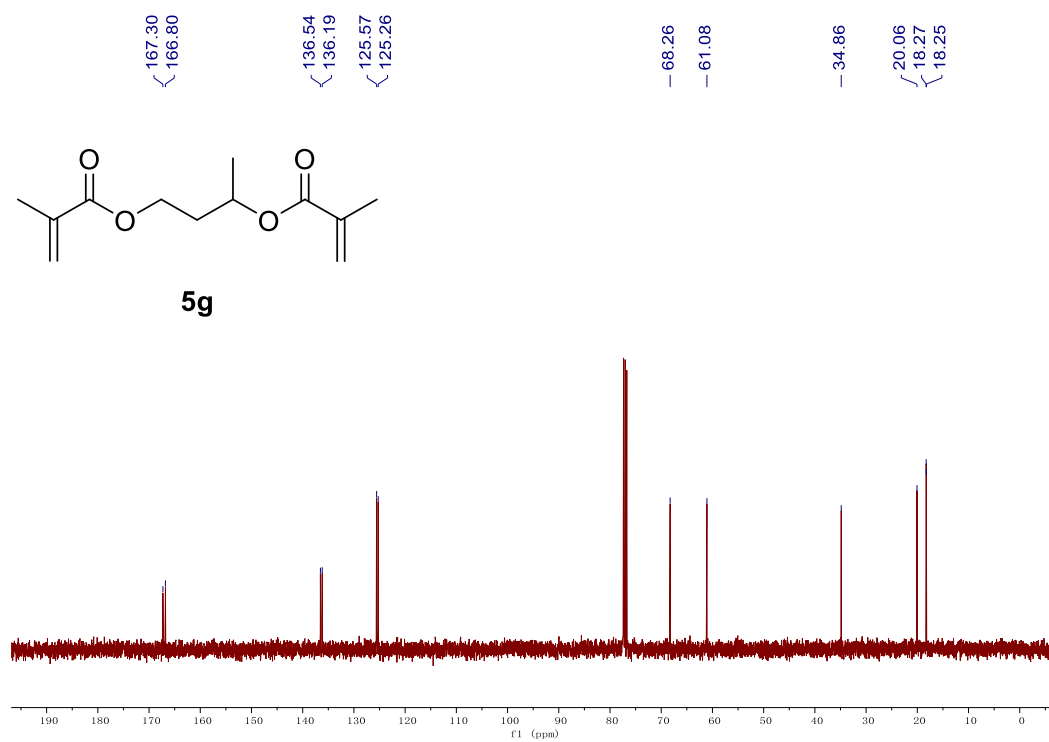

$^1\text{H}$  NMR, 400 MHz,  $\text{CDCl}_3$

6.02  
6.01  
5.48  
5.47  
4.97  
4.96  
4.94  
4.93  
4.91  
4.90  
4.10  
4.09  
4.07

1.87  
1.67  
1.66  
1.64  
1.62  
1.21  
1.20

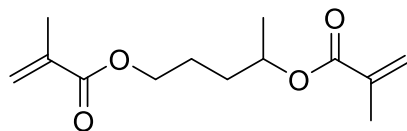

5h

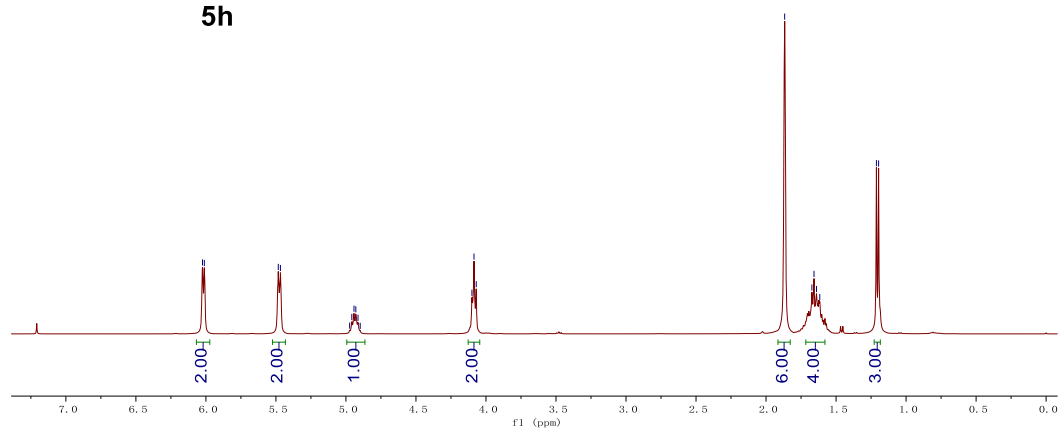

$^{13}\text{C}$  NMR, 101 MHz,  $\text{CDCl}_3$

167.37  
166.96  
136.70  
136.36  
125.32  
125.07

70.69  
64.35

32.42  
24.69  
19.88  
18.28

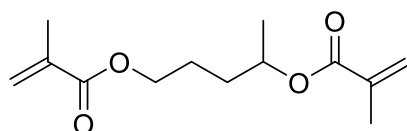

5h

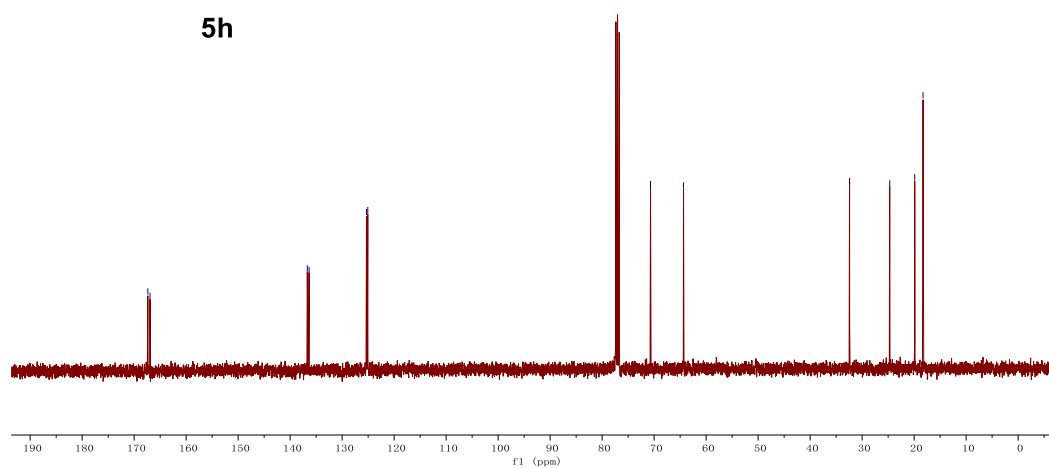

Supplement: d4ob01180e1.pdf [file d4ob01180e1.pdf]
